# Supplementary material for: On the Importance of Individualized, Non-Coplanar Beam Configurations in Mediastinal Lymphoma Radiotherapy, Optimized With Automated Planning
Source: PubMed Central journal article supplement (PMC8082440; doi:10.3389/fonc.2021.619929), 2021-04-15
Supplement: Image_2.pdf [file Image_2.pdf]

## Electronic supplement B

### B1 Patient cohort

**Figure B1.** Study patients ordered according to descending heart Dmean in the NCP\_15 plans. Patient 0 was excluded from all analyses because of unacceptable autoplans (see Electronic appendix A). red: PTV, pink: patient.

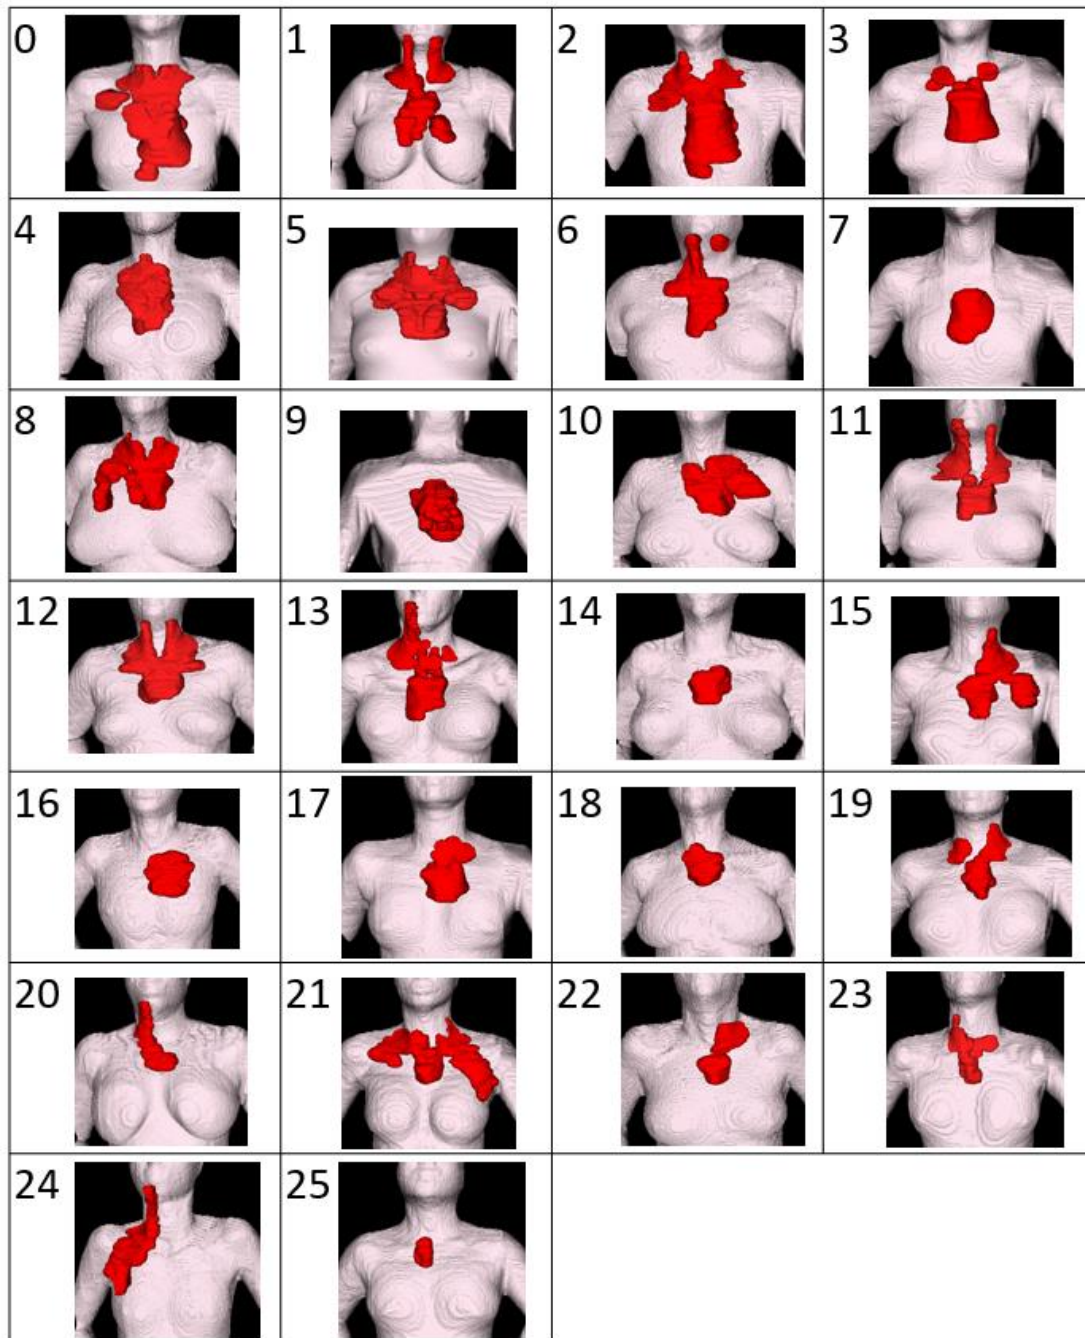

## B2 Wish-list for mediastinal lymphoma autoplanning with Erasmus-iCycle

Autoplanning with Erasmus-iCycle is based on a patient-group-specific wish-list [1]. Hard constraints and prioritized objectives in the wish-list steer the optimizer in the multi-criterial plan generation. Constraints are always met, while objectives are goals that are optimized as much as possible, following the objective priorities and within the imposed hard constraints. Objectives are optimized sequentially, starting with the highest priority objective (priority 1). After each objective optimization, a constraint is added to the optimization problem, which is used for optimizing lower priority objectives without losing on obtained higher priority objective values [1-9].

The wish-list created in this study for young female mediastinal lymphoma patients, using the wish-list creation methodology as explained in the Electronic appendix of [8], is shown in Table B1. It contains constraints on (a) the PTV Dmean and Dmax to control tumor dose homogeneity, (b) shells at 0.3-5 cm distance from the PTV, to control dose fall off, (c) breast Dmean, and (d) entrance dose. With the LTCP cost function (logarithmic tumor control probability [9]) as first priority, plan generation always started with optimizing PTV coverage within the constraints, which was also clinically the most important objective. Next, the PTV minimum dose (priority 2) was optimized, again in line with clinical planning. Priority 3 tried to limit the maximum dose in a 2 cm ring around the PTV, while priority 4 aimed at reducing dose (to about 60% of the prescribed dose at 5 cm) in a larger volume, including the back muscles. With priorities 5-11, OAR doses were optimized, balancing dose delivery to breasts, heart and lungs. Mean doses and EUDs were used as cost functions. EUDs with  $a=0.5$  were used to control the low-dose bath in lungs and breasts. As last objective, the dose at 1 cm from the PTV (shell) was reduced to further minimize dose outside the PTV where possible.

**Table B1.** Wish-list used in autoplanning for all patients and beam configurations. \*: dose in first 2 cm inwards the patient contour, subtracting PTV expanded by 7 cm. \*\*= PTV expanded with 2 cm – PTV, \*\*\*= patient – (PTV expanded by 5 cm). LTCP = Logarithmic tumor control probability,  $D_c = 95\% \cdot \text{prescribed dose}$  and  $\alpha = \text{cell sensitivity}$ . EUD = Equivalent Uniform Dose,  $a = \text{volume parameter}$ . The use of goal and sufficient parameters is explained in [Breedveld 2012].

### Constraints

| Structure           | Type    | Limit   |
|---------------------|---------|---------|
| PTV                 | maximum | 32.1 Gy |
| PTV                 | mean    | 30.6 Gy |
| Breast L            | mean    | 5 Gy    |
| Breast R            | mean    | 5 Gy    |
| Shell 3 mm from PTV | maximum | 30 Gy   |
| Shell 1 cm from PTV | maximum | 28.5 Gy |
| Shell 3 cm from PTV | maximum | 27 Gy   |
| Shell 5 cm from PTV | maximum | 22.5 Gy |
| Entrance dose*      | maximum | 18 Gy   |

### Objectives

| Priority | Structure                 | Type    | Goal    | Sufficient | Parameters                            |
|----------|---------------------------|---------|---------|------------|---------------------------------------|
| 1        | PTV                       | LTCP    | 0.2     | 0.2        | $D_c = 28.5 \text{ Gy}, \alpha = 0.8$ |
| 2        | PTV                       | minimum | 28.5 Gy |            |                                       |
| 3        | Ring 2 cm around PTV**    | maximum | 28.5 Gy |            |                                       |
| 4        | Patient - PTV exp 5 cm*** | maximum | 21 Gy   |            |                                       |
| 5        | Lungs - PTV               | EUD     | 6 Gy    | 6 Gy       | a=0.5                                 |
| 6        | Lungs - PTV               | EUD     | 22 Gy   | 22 Gy      | a=8                                   |
| 7        | Breast L                  | EUD     | 0.9 Gy  |            | a=0.5                                 |
| 7        | Breast R                  | EUD     | 0.9 Gy  |            | a=0.5                                 |
| 8        | Heart - PTV               | mean    | 0 Gy    |            |                                       |
| 9        | Lungs - PTV               | mean    | 0 Gy    |            |                                       |
| 10       | Heart - PTV               | EUD     | 0 Gy    |            | a=8                                   |
| 11       | Breast L                  | EUD     | 0 Gy    |            | a=8                                   |
| 11       | Breast R                  | EUD     | 0 Gy    |            | a=8                                   |
| 12       | Shell 1 cm from PTV       | maximum | 27 Gy   |            |                                       |

### B3 Mutual dosimetric comparisons of all 24 investigated beam configurations (related to Fig. 3 in the body of the manuscript)

**Figure B2.** Each table below presents mutual comparisons of all 24 beam configuration approaches for each of the evaluated dosimetric plan parameters of the autoplans. Above the diagonal, mean differences (Treatment A – Treatment B) for patients 1-25 are presented. Green colours point at statistically significant differences. On the diagonal (A=B), absolute population mean plan parameter values for all 24 beam configuration approaches are presented. Below the diagonal, P-values for the plan parameter differences, presented above the diagonal, are reported. \* =  $p > 0.05$ , green values =  $p < 0.05$

## PTV V95% (%)

### Treatment B

|                   | CP <sub>5</sub>  | CP <sub>6</sub> | CP <sub>7</sub> | CP <sub>8</sub> | CP <sub>9</sub> | CP <sub>10</sub> | CP <sub>11</sub> | CP <sub>12</sub> | CP <sub>13</sub> | CP <sub>14</sub> | CP <sub>15</sub> | NCP <sub>5</sub> | NCP <sub>6</sub> | NCP <sub>7</sub> | NCP <sub>8</sub> | NCP <sub>9</sub> | NCP <sub>10</sub> | NCP <sub>11</sub> | NCP <sub>12</sub> | NCP <sub>13</sub> | NCP <sub>14</sub> | NCP <sub>15</sub> | VMAT | B-VMAT |      |
|-------------------|------------------|-----------------|-----------------|-----------------|-----------------|------------------|------------------|------------------|------------------|------------------|------------------|------------------|------------------|------------------|------------------|------------------|-------------------|-------------------|-------------------|-------------------|-------------------|-------------------|------|--------|------|
| Treatment A       | CP <sub>5</sub>  | 99.6            | -0.0            | 0.0             | 0.1             | 0.1              | 0.1              | 0.1              | 0.2              | 0.2              | 0.3              | -0.1             | -0.1             | -0.0             | 0.0              | 0.1              | 0.1               | 0.1               | 0.1               | 0.2               | 0.2               | 0.2               | 0.2  | 0.2    | 0.2  |
|                   | CP <sub>6</sub>  | 0.003           | 99.6            | 0.0             | 0.1             | 0.1              | 0.1              | 0.1              | 0.2              | 0.2              | 0.2              | 0.3              | -0.1             | -0.0             | 0.0              | 0.1              | 0.1               | 0.1               | 0.1               | 0.2               | 0.2               | 0.2               | 0.2  | 0.2    | 0.3  |
|                   | CP <sub>7</sub>  | 0.001           | 0.001           | 99.6            | 0.0             | 0.1              | 0.1              | 0.1              | 0.1              | 0.1              | 0.1              | 0.2              | 0.2              | -0.2             | -0.1             | -0.0             | 0.0               | 0.1               | 0.1               | 0.1               | 0.1               | 0.1               | 0.2  | 0.2    | 0.2  |
|                   | CP <sub>8</sub>  | <0.001          | <0.001          | 0.002           | 99.6            | 0.0              | 0.0              | 0.1              | 0.1              | 0.1              | 0.1              | 0.2              | -0.2             | -0.1             | -0.1             | -0.0             | 0.0               | 0.0               | 0.1               | 0.1               | 0.1               | 0.1               | 0.1  | 0.2    | 0.2  |
|                   | CP <sub>9</sub>  | <0.001          | <0.001          | <0.001          | <0.001          | 99.5             | 0.0              | 0.0              | 0.1              | 0.1              | 0.1              | 0.2              | -0.2             | -0.1             | -0.1             | -0.0             | -0.0              | 0.0               | 0.0               | 0.1               | 0.1               | 0.1               | 0.1  | 0.1    | 0.2  |
|                   | CP <sub>10</sub> | <0.001          | <0.001          | <0.001          | <0.001          | 0.002            | 99.5             | 0.0              | 0.0              | 0.1              | 0.1              | 0.2              | -0.2             | -0.2             | -0.1             | -0.1             | -0.0              | -0.0              | 0.0               | 0.0               | 0.1               | 0.1               | 0.1  | 0.1    | 0.1  |
|                   | CP <sub>11</sub> | <0.001          | <0.001          | <0.001          | <0.001          | <0.001           | 0.005            | 99.5             | 0.0              | 0.1              | 0.1              | 0.2              | -0.2             | -0.2             | -0.1             | -0.1             | -0.0              | -0.0              | 0.0               | 0.0               | 0.0               | 0.1               | 0.1  | 0.1    | 0.1  |
|                   | CP <sub>12</sub> | <0.001          | <0.001          | <0.001          | <0.001          | <0.001           | <0.001           | <0.001           | 99.5             | 0.0              | 0.0              | 0.1              | -0.3             | -0.2             | -0.1             | -0.1             | -0.1              | -0.0              | -0.0              | 0.0               | 0.0               | 0.1               | 0.1  | 0.1    | 0.1  |
|                   | CP <sub>13</sub> | <0.001          | <0.001          | <0.001          | <0.001          | <0.001           | <0.001           | <0.001           | <0.001           | 99.4             | 0.0              | 0.1              | -0.3             | -0.2             | -0.2             | -0.1             | -0.1              | -0.1              | -0.1              | -0.0              | -0.0              | 0.0               | 0.1  | 0.1    | 0.1  |
|                   | CP <sub>14</sub> | <0.001          | <0.001          | <0.001          | <0.001          | <0.001           | <0.001           | <0.001           | <0.001           | 0.028            | 99.4             | 0.1              | -0.3             | -0.2             | -0.2             | -0.1             | -0.1              | -0.1              | -0.1              | -0.0              | -0.0              | 0.0               | 0.0  | 0.0    | 0.1  |
|                   | CP <sub>15</sub> | <0.001          | <0.001          | <0.001          | <0.001          | <0.001           | <0.001           | <0.001           | <0.001           | <0.001           | <0.001           | 99.3             | -0.4             | -0.3             | -0.3             | -0.2             | -0.2              | -0.2              | -0.2              | -0.1              | -0.1              | -0.1              | -0.0 | -0.0   | -0.0 |
|                   | NCP <sub>5</sub> | *               | <0.001          | <0.001          | <0.001          | <0.001           | <0.001           | <0.001           | <0.001           | <0.001           | <0.001           | <0.001           | 99.7             | 0.1              | 0.1              | 0.2              | 0.2               | 0.2               | 0.2               | 0.3               | 0.3               | 0.3               | 0.3  | 0.3    | 0.4  |
|                   | NCP <sub>6</sub> | *               | *               | <0.001          | <0.001          | <0.001           | <0.001           | <0.001           | <0.001           | <0.001           | <0.001           | <0.001           | <0.001           | 99.7             | 0.1              | 0.1              | 0.1               | 0.1               | 0.2               | 0.2               | 0.2               | 0.2               | 0.3  | 0.3    | 0.3  |
|                   | NCP <sub>7</sub> | 0.008           | *               | *               | 0.012           | 0.005            | <0.001           | <0.001           | <0.001           | <0.001           | <0.001           | <0.001           | <0.001           | <0.001           | 99.6             | 0.0              | 0.1               | 0.1               | 0.1               | 0.1               | 0.2               | 0.2               | 0.2  | 0.2    | 0.2  |
|                   | NCP <sub>8</sub> | 0.001           | 0.015           | *               | *               | *                | 0.009            | 0.005            | 0.001            | <0.001           | <0.001           | <0.001           | <0.001           | <0.001           | <0.001           | 99.6             | 0.0               | 0.0               | 0.1               | 0.1               | 0.1               | 0.1               | 0.1  | 0.2    | 0.2  |
|                   | NCP <sub>9</sub> | <0.001          | 0.005           | 0.020           | *               | *                | *                | 0.045            | 0.006            | <0.001           | <0.001           | <0.001           | <0.001           | <0.001           | <0.001           | 99.5             | 0.0               | 0.0               | 0.1               | 0.1               | 0.1               | 0.1               | 0.1  | 0.1    | 0.2  |
| NCP <sub>10</sub> | <0.001           | 0.002           | 0.004           | *               | *               | *                | *                | 0.019            | 0.001            | <0.001           | <0.001           | <0.001           | <0.001           | <0.001           | 0.002            | 99.5             | 0.0               | 0.0               | 0.1               | 0.1               | 0.1               | 0.1               | 0.1  | 0.1    |      |
| NCP <sub>11</sub> | <0.001           | 0.002           | <0.001          | 0.009           | *               | *                | *                | *                | 0.024            | 0.009            | 0.002            | <0.001           | <0.001           | <0.001           | <0.001           | <0.001           | 99.5              | 0.0               | 0.0               | 0.1               | 0.1               | 0.1               | 0.1  | 0.1    |      |
| NCP <sub>12</sub> | <0.001           | <0.001          | <0.001          | 0.001           | 0.009           | *                | *                | *                | *                | *                | 0.011            | <0.001           | <0.001           | <0.001           | <0.001           | <0.001           | <0.001            | 99.5              | 0.0               | 0.1               | 0.1               | 0.1               | 0.1  | 0.1    |      |
| NCP <sub>13</sub> | <0.001           | <0.001          | <0.001          | <0.001          | <0.001          | 0.008            | 0.025            | *                | *                | *                | 0.037            | <0.001           | <0.001           | <0.001           | <0.001           | <0.001           | <0.001            | <0.001            | 99.4              | 0.0               | 0.1               | 0.1               | 0.1  | 0.1    |      |
| NCP <sub>14</sub> | <0.001           | <0.001          | <0.001          | <0.001          | <0.001          | <0.001           | 0.002            | 0.015            | *                | *                | *                | <0.001           | <0.001           | <0.001           | <0.001           | <0.001           | <0.001            | <0.001            | <0.001            | 99.4              | 0.0               | 0.0               | 0.0  | 0.0    |      |
| NCP <sub>15</sub> | <0.001           | <0.001          | <0.001          | <0.001          | <0.001          | <0.001           | <0.001           | <0.001           | 0.022            | *                | *                | <0.001           | <0.001           | <0.001           | <0.001           | <0.001           | <0.001            | <0.001            | <0.001            | <0.001            | 99.4              | -0.0              | 0.0  | 0.0    |      |
| VMAT              | <0.001           | <0.001          | <0.001          | <0.001          | <0.001          | <0.001           | <0.001           | <0.001           | 0.003            | 0.007            | *                | <0.001           | <0.001           | <0.001           | <0.001           | <0.001           | <0.001            | <0.001            | 0.001             | 0.006             | 0.014             | *                 | *    | 99.4   | 0.0  |
| B-VMAT            | <0.001           | <0.001          | <0.001          | <0.001          | <0.001          | <0.001           | <0.001           | 0.005            | 0.028            | *                | *                | <0.001           | <0.001           | <0.001           | <0.001           | <0.001           | <0.001            | <0.001            | <0.001            | <0.001            | 0.006             | *                 | *    | *      | 99.4 |

## PTV V90% (cc)

### Treatment B

|                   | CP <sub>5</sub>  | CP <sub>6</sub> | CP <sub>7</sub> | CP <sub>8</sub> | CP <sub>9</sub> | CP <sub>10</sub> | CP <sub>11</sub> | CP <sub>12</sub> | CP <sub>13</sub> | CP <sub>14</sub> | CP <sub>15</sub> | NCP <sub>5</sub> | NCP <sub>6</sub> | NCP <sub>7</sub> | NCP <sub>8</sub> | NCP <sub>9</sub> | NCP <sub>10</sub> | NCP <sub>11</sub> | NCP <sub>12</sub> | NCP <sub>13</sub> | NCP <sub>14</sub> | NCP <sub>15</sub> | VMAT  | B-VMAT |       |     |
|-------------------|------------------|-----------------|-----------------|-----------------|-----------------|------------------|------------------|------------------|------------------|------------------|------------------|------------------|------------------|------------------|------------------|------------------|-------------------|-------------------|-------------------|-------------------|-------------------|-------------------|-------|--------|-------|-----|
| Treatment A       | CP <sub>5</sub>  | 689.3           | -0.1            | -0.1            | -0.0            | 0.0              | 0.1              | 0.1              | 0.1              | 0.2              | 0.2              | 0.2              | -0.2             | -0.1             | -0.1             | 0.0              | 0.1               | 0.1               | 0.2               | 0.2               | 0.2               | 0.3               | 0.3   | 0.2    | 0.4   |     |
|                   | CP <sub>6</sub>  | 0.001           | 689.4           | 0.1             | 0.1             | 0.2              | 0.2              | 0.2              | 0.3              | 0.3              | 0.3              | 0.4              | -0.1             | 0.0              | 0.1              | 0.1              | 0.2               | 0.3               | 0.3               | 0.3               | 0.4               | 0.4               | 0.4   | 0.3    | 0.5   |     |
|                   | CP <sub>7</sub>  | <0.001          | 0.001           | 689.4           | 0.1             | 0.1              | 0.2              | 0.2              | 0.2              | 0.2              | 0.3              | 0.3              | -0.1             | -0.1             | 0.0              | 0.1              | 0.2               | 0.2               | 0.2               | 0.3               | 0.3               | 0.4               | 0.4   | 0.3    | 0.5   |     |
|                   | CP <sub>8</sub>  | <0.001          | <0.001          | <0.001          | 689.3           | 0.0              | 0.1              | 0.1              | 0.1              | 0.2              | 0.2              | 0.2              | -0.2             | -0.1             | -0.0             | 0.0              | 0.1               | 0.1               | 0.2               | 0.2               | 0.3               | 0.3               | 0.3   | 0.2    | 0.4   |     |
|                   | CP <sub>9</sub>  | <0.001          | <0.001          | <0.001          | 0.003           | 689.3            | 0.1              | 0.1              | 0.1              | 0.1              | 0.2              | 0.2              | -0.3             | -0.2             | -0.1             | -0.0             | 0.1               | 0.1               | 0.1               | 0.2               | 0.2               | 0.2               | 0.2   | 0.3    | 0.2   | 0.4 |
|                   | CP <sub>10</sub> | <0.001          | <0.001          | <0.001          | <0.001          | <0.001           | 689.2            | 0.0              | 0.1              | 0.1              | 0.1              | 0.2              | -0.3             | -0.2             | -0.1             | -0.1             | 0.0               | 0.0               | 0.1               | 0.1               | 0.2               | 0.2               | 0.2   | 0.1    | 0.3   |     |
|                   | CP <sub>11</sub> | <0.001          | <0.001          | <0.001          | <0.001          | <0.001           | 0.028            | 689.2            | 0.0              | 0.1              | 0.1              | 0.1              | -0.3             | -0.2             | -0.2             | -0.1             | -0.0              | 0.0               | 0.1               | 0.1               | 0.1               | 0.2               | 0.2   | 0.1    | 0.3   |     |
|                   | CP <sub>12</sub> | <0.001          | <0.001          | <0.001          | <0.001          | <0.001           | 0.002            | 0.004            | 689.2            | 0.0              | 0.1              | 0.1              | -0.4             | -0.3             | -0.2             | -0.1             | -0.1              | -0.0              | 0.0               | 0.1               | 0.1               | 0.1               | 0.2   | 0.0    | 0.3   |     |
|                   | CP <sub>13</sub> | <0.001          | <0.001          | <0.001          | <0.001          | <0.001           | <0.001           | <0.001           | <0.001           | 689.1            | 0.0              | 0.1              | -0.4             | -0.3             | -0.2             | -0.2             | -0.1              | -0.1              | -0.0              | 0.0               | 0.1               | 0.1               | 0.1   | 0.0    | 0.2   |     |
|                   | CP <sub>14</sub> | <0.001          | <0.001          | <0.001          | <0.001          | <0.001           | <0.001           | <0.001           | 0.022            | 689.1            | 0.0              | -0.4             | -0.3             | -0.3             | -0.2             | -0.1             | -0.1              | -0.0              | -0.0              | 0.1               | 0.1               | 0.1               | 0.1   | -0.0   | 0.2   |     |
|                   | CP <sub>15</sub> | <0.001          | <0.001          | <0.001          | <0.001          | <0.001           | <0.001           | <0.001           | <0.001           | <0.001           | 0.002            | 689.1            | -0.5             | -0.4             | -0.3             | -0.2             | -0.1              | -0.1              | -0.1              | -0.0              | 0.0               | 0.0               | 0.1   | -0.1   | 0.2   |     |
|                   | NCP <sub>5</sub> | *               | 0.048           | <0.001          | <0.001          | <0.001           | <0.001           | <0.001           | <0.001           | <0.001           | <0.001           | <0.001           | 689.5            | 0.1              | 0.2              | 0.2              | 0.3               | 0.3               | 0.4               | 0.4               | 0.5               | 0.5               | 0.5   | 0.4    | 0.6   |     |
|                   | NCP <sub>6</sub> | 0.024           | *               | *               | 0.049           | 0.007            | <0.001           | <0.001           | <0.001           | <0.001           | <0.001           | <0.001           | <0.001           | 689.4            | 0.1              | 0.1              | 0.2               | 0.3               | 0.3               | 0.3               | 0.4               | 0.4               | 0.4   | 0.3    | 0.5   |     |
|                   | NCP <sub>7</sub> | <0.001          | 0.037           | *               | *               | *                | 0.015            | 0.004            | <0.001           | <0.001           | <0.001           | <0.001           | <0.001           | <0.001           | 689.4            | 0.1              | 0.1               | 0.2               | 0.2               | 0.2               | 0.2               | 0.3               | 0.3   | 0.4    | 0.2   | 0.5 |
|                   | NCP <sub>8</sub> | <0.001          | 0.012           | *               | *               | *                | *                | *                | 0.044            | 0.014            | 0.008            | <0.001           | <0.001           | <0.001           | 0.002            | 689.3            | 0.1               | 0.1               | 0.2               | 0.2               | 0.2               | 0.2               | 0.3   | 0.3    | 0.2   | 0.4 |
|                   | NCP <sub>9</sub> | <0.001          | 0.001           | 0.003           | *               | *                | *                | *                | *                | *                | *                | 0.015            | <0.001           | <0.001           | <0.001           | <0.001           | 689.2             | 0.0               | 0.1               | 0.1               | 0.2               | 0.2               | 0.2   | 0.1    | 0.3   |     |
| NCP <sub>10</sub> | <0.001           | <0.001          | 0.002           | 0.021           | *               | *                | *                | *                | *                | *                | 0.044            | <0.001           | <0.001           | <0.001           | <0.001           | 689.2            | 0.0               | 0.1               | 0.1               | 0.1               | 0.2               | 0.2               | 0.1   | 0.3    |       |     |
| NCP <sub>11</sub> | <0.001           | <0.001          | <0.001          | 0.006           | 0.022           | *                | *                | *                | *                | *                | *                | <0.001           | <0.001           | <0.001           | <0.001           | <0.001           | 689.1             | 0.0               | 0.1               | 0.1               | 0.1               | 0.1               | 0.0   | 0.2    |       |     |
| NCP <sub>12</sub> | <0.001           | <0.001          | <0.001          | 0.002           | 0.009           | *                | *                | *                | *                | *                | *                | <0.001           | <0.001           | <0.001           | <0.001           | <0.001           | 0.025             | 689.1             | 0.1               | 0.1               | 0.1               | 0.1               | -0.0  | 0.2    |       |     |
| NCP <sub>13</sub> | <0.001           | <0.001          | <0.001          | <0.001          | 0.001           | 0.011            | 0.014            | *                | *                | *                | *                | <0.001           | <0.001           | <0.001           | <0.001           | <0.001           | <0.001            | <0.001            | 689.1             | 0.0               | 0.1               | 0.1               | -0.1  | 0.2    |       |     |
| NCP <sub>14</sub> | <0.001           | <0.001          | <0.001          | <0.001          | 0.001           | 0.006            | 0.011            | 0.032            | *                | *                | *                | <0.001           | <0.001           | <0.001           | <0.001           | <0.001           | <0.001            | <0.001            | <0.001            | 0.006             | 689.0             | 0.0               | -0.1  | 0.1    |       |     |
| NCP <sub>15</sub> | <0.001           | <0.001          | <0.001          | <0.001          | <0.001          | 0.002            | 0.003            | 0.010            | 0.028            | *                | *                | <0.001           | <0.001           | <0.001           | <0.001           | <0.001           | <0.001            | <0.001            | <0.001            | <0.001            | 0.010             | 689.0             | -0.1  | 0.1    |       |     |
| VMAT              | <0.001           | <0.001          | <0.001          | <0.001          | <0.001          | 0.022            | 0.018            | *                | *                | *                | *                | <0.001           | <0.001           | <0.001           | 0.001            | 0.039            | *                 | *                 | *                 | *                 | 0.037             | 0.007             | 689.1 | 0.2    |       |     |
| B-VMAT            | <0.001           | <0.001          | <0.001          | <0.001          | <0.001          | <0.001           | 0.001            | 0.003            | 0.007            | 0.013            | 0.026            | <0.001           | <0.001           | <0.001           | <0.001           | <0.001           | <0.001            | <0.001            | 0.007             | 0.014             | *                 | *                 | *     | 0.005  | 688.9 |     |



## Right Breast Dmean (Gy)

### Treatment B

|                   | CP <sub>5</sub> | CP <sub>6</sub> | CP <sub>7</sub> | CP <sub>8</sub> | CP <sub>9</sub> | CP <sub>10</sub> | CP <sub>11</sub> | CP <sub>12</sub> | CP <sub>13</sub> | CP <sub>14</sub> | CP <sub>15</sub> | NCP <sub>5</sub> | NCP <sub>6</sub> | NCP <sub>7</sub> | NCP <sub>8</sub> | NCP <sub>9</sub> | NCP <sub>10</sub> | NCP <sub>11</sub> | NCP <sub>12</sub> | NCP <sub>13</sub> | NCP <sub>14</sub> | NCP <sub>15</sub> | VMAT   | B-VMAT |     |
|-------------------|-----------------|-----------------|-----------------|-----------------|-----------------|------------------|------------------|------------------|------------------|------------------|------------------|------------------|------------------|------------------|------------------|------------------|-------------------|-------------------|-------------------|-------------------|-------------------|-------------------|--------|--------|-----|
| CP <sub>5</sub>   | 1.8             | -0.0            | 0.0             | 0.0             | 0.0             | 0.0              | 0.1              | 0.1              | 0.1              | 0.1              | 0.1              | -0.0             | 0.0              | 0.1              | 0.1              | 0.2              | 0.2               | 0.2               | 0.2               | 0.2               | 0.2               | 0.2               | 0.2    | 0.1    | 0.4 |
| CP <sub>6</sub>   | *               | 1.8             | 0.0             | 0.0             | 0.0             | 0.0              | 0.1              | 0.1              | 0.1              | 0.1              | 0.1              | -0.0             | 0.0              | 0.1              | 0.2              | 0.2              | 0.2               | 0.2               | 0.3               | 0.3               | 0.3               | 0.2               | 0.1    | 0.4    |     |
| CP <sub>7</sub>   | *               | *               | 1.8             | 0.0             | 0.0             | 0.0              | 0.0              | 0.0              | 0.1              | 0.1              | 0.1              | -0.0             | -0.0             | 0.1              | 0.1              | 0.1              | 0.2               | 0.2               | 0.2               | 0.2               | 0.2               | 0.2               | 0.1    | 0.3    |     |
| CP <sub>8</sub>   | *               | *               | *               | 1.8             | 0.0             | 0.0              | 0.0              | 0.0              | 0.0              | 0.1              | 0.1              | -0.0             | -0.0             | 0.1              | 0.1              | 0.1              | 0.2               | 0.2               | 0.2               | 0.2               | 0.2               | 0.2               | 0.1    | 0.3    |     |
| CP <sub>9</sub>   | *               | 0.033           | 0.030           | *               | 1.8             | 0.0              | 0.0              | 0.0              | 0.0              | 0.0              | 0.0              | -0.1             | -0.0             | 0.1              | 0.1              | 0.1              | 0.1               | 0.2               | 0.2               | 0.2               | 0.2               | 0.2               | 0.1    | 0.3    |     |
| CP <sub>10</sub>  | *               | *               | *               | *               | *               | 1.8              | 0.0              | 0.0              | 0.0              | 0.0              | 0.0              | -0.1             | -0.0             | 0.1              | 0.1              | 0.1              | 0.1               | 0.2               | 0.2               | 0.2               | 0.2               | 0.2               | 0.1    | 0.3    |     |
| CP <sub>11</sub>  | *               | 0.036           | *               | 0.040           | *               | *                | 1.8              | 0.0              | 0.0              | 0.0              | 0.0              | -0.1             | -0.0             | 0.0              | 0.1              | 0.1              | 0.1               | 0.2               | 0.2               | 0.2               | 0.2               | 0.2               | 0.0    | 0.3    |     |
| CP <sub>12</sub>  | *               | 0.041           | *               | *               | *               | *                | *                | 1.8              | 0.0              | 0.0              | 0.0              | -0.1             | -0.0             | 0.0              | 0.1              | 0.1              | 0.1               | 0.2               | 0.2               | 0.2               | 0.2               | 0.2               | 0.0    | 0.3    |     |
| CP <sub>13</sub>  | 0.048           | 0.034           | 0.020           | 0.029           | 0.046           | 0.015            | *                | *                | 1.8              | 0.0              | 0.0              | -0.1             | -0.1             | 0.0              | 0.1              | 0.1              | 0.1               | 0.2               | 0.2               | 0.2               | 0.2               | 0.2               | 0.0    | 0.3    |     |
| CP <sub>14</sub>  | 0.025           | 0.020           | 0.037           | *               | *               | *                | *                | *                | *                | 1.8              | 0.0              | -0.1             | -0.1             | 0.0              | 0.1              | 0.1              | 0.1               | 0.1               | 0.2               | 0.2               | 0.2               | 0.2               | 0.0    | 0.3    |     |
| CP <sub>15</sub>  | 0.021           | 0.006           | 0.027           | *               | *               | *                | *                | *                | *                | *                | 1.8              | -0.1             | -0.1             | 0.0              | 0.1              | 0.1              | 0.1               | 0.1               | 0.2               | 0.2               | 0.2               | 0.2               | 0.0    | 0.3    |     |
| NCP <sub>5</sub>  | *               | *               | *               | *               | *               | *                | *                | *                | *                | *                | *                | 1.9              | 0.0              | 0.1              | 0.2              | 0.2              | 0.2               | 0.3               | 0.3               | 0.3               | 0.3               | 0.3               | 0.1    | 0.4    |     |
| NCP <sub>6</sub>  | *               | *               | *               | *               | *               | *                | *                | *                | *                | *                | *                | *                | 1.8              | 0.1              | 0.1              | 0.1              | 0.2               | 0.2               | 0.2               | 0.2               | 0.2               | 0.2               | 0.1    | 0.3    |     |
| NCP <sub>7</sub>  | *               | *               | *               | *               | *               | *                | *                | *                | *                | *                | *                | 0.018            | 0.003            | 1.7              | 0.1              | 0.1              | 0.1               | 0.2               | 0.2               | 0.2               | 0.2               | 0.1               | 0.0    | 0.3    |     |
| NCP <sub>8</sub>  | *               | 0.045           | 0.033           | 0.032           | *               | *                | *                | *                | *                | *                | *                | 0.019            | <0.001           | 0.039            | 1.7              | 0.0              | 0.0               | 0.1               | 0.1               | 0.1               | 0.1               | 0.1               | -0.0   | 0.2    |     |
| NCP <sub>9</sub>  | 0.030           | 0.011           | 0.008           | 0.011           | 0.016           | 0.037            | *                | *                | *                | *                | *                | 0.021            | 0.006            | *                | *                | 1.7              | 0.0               | 0.1               | 0.1               | 0.1               | 0.1               | 0.1               | -0.1   | 0.2    |     |
| NCP <sub>10</sub> | 0.019           | 0.012           | 0.006           | 0.012           | 0.012           | 0.028            | *                | *                | *                | *                | *                | 0.019            | 0.005            | *                | *                | *                | 1.6               | 0.0               | 0.1               | 0.1               | 0.1               | 0.0               | -0.1   | 0.2    |     |
| NCP <sub>11</sub> | 0.005           | 0.002           | 0.002           | 0.003           | 0.005           | 0.007            | 0.010            | 0.021            | 0.032            | *                | *                | 0.005            | 0.001            | 0.004            | 0.022            | 0.002            | <0.001            | 1.6               | 0.0               | 0.0               | 0.0               | 0.0               | -0.1   | 0.1    |     |
| NCP <sub>12</sub> | 0.006           | 0.001           | 0.002           | 0.003           | 0.003           | 0.004            | 0.007            | 0.011            | 0.016            | 0.025            | 0.018            | 0.005            | <0.001           | 0.012            | 0.036            | 0.007            | 0.002             | *                 | 1.6               | -0.0              | -0.0              | -0.0              | -0.1   | 0.1    |     |
| NCP <sub>13</sub> | 0.006           | 0.002           | 0.003           | 0.004           | 0.006           | 0.007            | 0.012            | 0.022            | 0.031            | 0.046            | 0.025            | 0.003            | <0.001           | 0.008            | 0.030            | 0.023            | 0.024             | *                 | *                 | 1.6               | 0.0               | -0.0              | -0.1   | 0.1    |     |
| NCP <sub>14</sub> | 0.006           | 0.001           | 0.002           | 0.003           | 0.004           | 0.003            | 0.006            | 0.010            | 0.013            | 0.015            | 0.010            | 0.004            | <0.001           | 0.016            | *                | 0.008            | 0.026             | *                 | *                 | *                 | 1.6               | -0.0              | -0.1   | 0.1    |     |
| NCP <sub>15</sub> | 0.005           | 0.001           | 0.002           | 0.003           | 0.003           | 0.003            | 0.009            | 0.010            | 0.016            | 0.021            | 0.016            | 0.003            | <0.001           | 0.006            | 0.040            | 0.016            | 0.017             | *                 | *                 | *                 | *                 | 1.6               | -0.1   | 0.1    |     |
| VMAT              | 0.022           | 0.025           | *               | *               | *               | *                | *                | *                | *                | *                | *                | *                | *                | *                | *                | *                | *                 | 0.029             | 0.021             | 0.041             | 0.030             | 0.037             | 1.7    | 0.3    |     |
| B-VMAT            | <0.001          | <0.001          | <0.001          | <0.001          | <0.001          | <0.001           | <0.001           | <0.001           | <0.001           | 0.001            | <0.001           | <0.001           | <0.001           | <0.001           | 0.003            | 0.009            | 0.001             | 0.004             | *                 | *                 | *                 | *                 | <0.001 | 1.5    |     |

## Right Breast V4Gy (%)

### Treatment B

|                   | CP <sub>5</sub> | CP <sub>6</sub> | CP <sub>7</sub> | CP <sub>8</sub> | CP <sub>9</sub> | CP <sub>10</sub> | CP <sub>11</sub> | CP <sub>12</sub> | CP <sub>13</sub> | CP <sub>14</sub> | CP <sub>15</sub> | NCP <sub>5</sub> | NCP <sub>6</sub> | NCP <sub>7</sub> | NCP <sub>8</sub> | NCP <sub>9</sub> | NCP <sub>10</sub> | NCP <sub>11</sub> | NCP <sub>12</sub> | NCP <sub>13</sub> | NCP <sub>14</sub> | NCP <sub>15</sub> | VMAT  | B-VMAT |
|-------------------|-----------------|-----------------|-----------------|-----------------|-----------------|------------------|------------------|------------------|------------------|------------------|------------------|------------------|------------------|------------------|------------------|------------------|-------------------|-------------------|-------------------|-------------------|-------------------|-------------------|-------|--------|
| CP <sub>5</sub>   | 11.8            | 0.2             | 0.7             | 0.9             | 1.1             | 1.8              | 2.3              | 2.2              | 2.2              | 2.4              | 2.5              | 1.3              | 2.9              | 3.1              | 3.5              | 3.7              | 3.8               | 3.8               | 3.7               | 4.1               | 4.1               | 4.2               | 1.8   | 4.1    |
| CP <sub>6</sub>   | 0.048           | 11.0            | 0.5             | 0.7             | 0.9             | 1.6              | 2.1              | 2.0              | 2.0              | 2.2              | 2.3              | 1.2              | 2.8              | 3.0              | 3.3              | 3.6              | 3.7               | 3.7               | 3.5               | 3.9               | 3.9               | 4.0               | 1.6   | 4.0    |
| CP <sub>7</sub>   | *               | *               | 11.1            | 0.2             | 0.4             | 1.1              | 1.7              | 1.5              | 1.5              | 1.7              | 1.8              | 0.6              | 2.3              | 2.5              | 2.8              | 3.1              | 3.2               | 3.2               | 3.0               | 3.4               | 3.4               | 3.5               | 1.1   | 3.4    |
| CP <sub>8</sub>   | 0.030           | 0.044           | *               | 10.8            | 0.1             | 0.9              | 1.4              | 1.3              | 1.2              | 1.4              | 1.5              | 0.4              | 2.1              | 2.3              | 2.6              | 2.9              | 3.0               | 3.0               | 2.8               | 3.1               | 3.1               | 3.3               | 0.9   | 3.2    |
| CP <sub>9</sub>   | *               | *               | *               | *               | 10.7            | 0.8              | 1.3              | 1.2              | 1.1              | 1.3              | 1.4              | 0.3              | 2.0              | 2.1              | 2.5              | 2.7              | 2.8               | 2.8               | 2.7               | 3.0               | 3.0               | 3.2               | 0.7   | 3.1    |
| CP <sub>10</sub>  | 0.040           | 0.023           | 0.004           | *               | *               | 9.9              | 0.5              | 0.4              | 0.3              | 0.5              | 0.6              | -0.5             | 1.2              | 1.3              | 1.7              | 1.9              | 2.0               | 2.0               | 1.9               | 2.2               | 2.2               | 2.4               | -0.0  | 2.1    |
| CP <sub>11</sub>  | 0.004           | 0.007           | 0.001           | 0.008           | 0.003           | 0.006            | 9.4              | -0.1             | -0.2             | 0.0              | 0.1              | -1.0             | 0.6              | 0.8              | 1.1              | 1.4              | 1.5               | 1.5               | 1.4               | 1.7               | 1.7               | 1.9               | -0.5  | 1.6    |
| CP <sub>12</sub>  | 0.018           | 0.011           | 0.003           | 0.019           | 0.020           | 0.020            | *                | 9.5              | -0.1             | 0.1              | 0.2              | -0.9             | 0.7              | 0.9              | 1.3              | 1.5              | 1.6               | 1.6               | 1.5               | 1.8               | 1.8               | 2.0               | -0.4  | 1.7    |
| CP <sub>13</sub>  | 0.025           | 0.017           | 0.010           | *               | 0.028           | 0.036            | *                | *                | 9.6              | 0.2              | 0.3              | -0.9             | 0.8              | 1.0              | 1.3              | 1.6              | 1.7               | 1.7               | 1.5               | 1.9               | 1.9               | 2.1               | -0.4  | 1.8    |
| CP <sub>14</sub>  | 0.017           | 0.006           | 0.002           | 0.028           | 0.011           | 0.002            | *                | *                | *                | 9.4              | 0.1              | -1.1             | 0.6              | 0.7              | 1.1              | 1.3              | 1.5               | 1.5               | 1.3               | 1.7               | 1.7               | 1.9               | -0.6  | 1.6    |
| CP <sub>15</sub>  | 0.010           | 0.007           | 0.002           | 0.025           | 0.007           | 0.012            | *                | *                | *                | *                | 9.3              | -1.2             | 0.4              | 0.6              | 1.0              | 1.2              | 1.3               | 1.3               | 1.2               | 1.6               | 1.6               | 1.8               | -0.7  | 1.4    |
| NCP <sub>5</sub>  | *               | *               | *               | *               | *               | *                | *                | *                | *                | *                | *                | 10.9             | 1.7              | 1.8              | 2.2              | 2.4              | 2.5               | 2.5               | 2.4               | 2.8               | 2.8               | 3.0               | 0.5   | 2.2    |
| NCP <sub>6</sub>  | 0.049           | 0.049           | 0.040           | *               | *               | *                | *                | *                | *                | *                | *                | 0.025            | 9.2              | 0.2              | 0.5              | 0.8              | 0.9               | 0.9               | 0.7               | 1.1               | 1.1               | 1.3               | -1.2  | 0.3    |
| NCP <sub>7</sub>  | 0.024           | 0.014           | 0.030           | 0.040           | 0.027           | *                | *                | *                | *                | *                | *                | 0.020            | *                | 9.1              | 0.4              | 0.6              | 0.7               | 0.7               | 0.6               | 1.0               | 1.0               | 1.1               | -1.3  | 0.3    |
| NCP <sub>8</sub>  | 0.024           | 0.010           | 0.008           | 0.018           | 0.013           | 0.040            | *                | *                | *                | *                | *                | 0.033            | *                | *                | 8.7              | 0.2              | 0.4               | 0.4               | 0.2               | 0.6               | 0.6               | 0.8               | -1.7  | -0.3   |
| NCP <sub>9</sub>  | 0.030           | 0.016           | 0.011           | 0.018           | 0.011           | 0.023            | *                | *                | *                | *                | *                | *                | *                | *                | *                | 8.5              | 0.1               | 0.1               | -0.0              | 0.4               | 0.4               | 0.5               | -2.0  | -0.2   |
| NCP <sub>10</sub> | 0.022           | 0.011           | 0.014           | 0.027           | 0.013           | 0.022            | *                | *                | *                | *                | *                | *                | *                | *                | *                | *                | 8.4               | -0.0              | -0.1              | 0.2               | 0.2               | 0.4               | -2.1  | -0.3   |
| NCP <sub>11</sub> | 0.020           | 0.007           | 0.016           | 0.024           | 0.020           | 0.033            | *                | 0.049            | *                | *                | *                | *                | *                | *                | *                | *                | *                 | 8.4               | -0.1              | 0.2               | 0.2               | 0.4               | -2.1  | -0.5   |
| NCP <sub>12</sub> | 0.024           | 0.011           | 0.020           | 0.022           | 0.021           | 0.033            | *                | *                | *                | *                | *                | 0.046            | *                | *                | *                | *                | *                 | *                 | 8.5               | 0.4               | 0.4               | 0.6               | -1.9  | -0.3   |
| NCP <sub>13</sub> | 0.009           | 0.006           | 0.004           | 0.010           | 0.009           | 0.013            | *                | *                | 0.032            | *                | *                | 0.022            | *                | *                | *                | *                | *                 | *                 | *                 | 7.7               | -0.0              | 0.2               | -2.3  | -0.7   |
| NCP <sub>14</sub> | 0.005           | 0.003           | 0.003           | 0.011           | 0.006           | 0.012            | *                | *                | *                | *                | *                | 0.016            | *                | *                | *                | *                | *                 | *                 | *                 | *                 | 7.7               | 0.2               | -2.3  | -0.6   |
| NCP <sub>15</sub> | 0.003           | 0.002           | 0.002           | 0.004           | 0.005           | 0.005            | 0.023            | 0.019            | 0.017            | 0.021            | 0.033            | 0.024            | *                | *                | *                | *                | *                 | *                 | *                 | *                 | *                 | 7.5               | -2.4  | -0.7   |
| VMAT              | 0.023           | 0.010           | 0.048           | *               | *               | *                | *                | *                | *                | *                | *                | *                | *                | *                | 0.024            | 0.033            | 0.022             | 0.044             | *                 | 0.015             | 0.015             | 0.015             | 10.0  | 2.2    |
| B-VMAT            | 0.006           | 0.006           | 0.008           | 0.011           | 0.013           | 0.022            | 0.044            | *                | 0.049            | *                | *                | 0.031            | *                | *                | *                | *                | *                 | *                 | *                 | *                 | *                 | *                 | 0.039 | 9.0    |

# Left Breast Dmean (Gy)

## Treatment B

|                   | CP <sub>5</sub> | CP <sub>6</sub> | CP <sub>7</sub> | CP <sub>8</sub> | CP <sub>9</sub> | CP <sub>10</sub> | CP <sub>11</sub> | CP <sub>12</sub> | CP <sub>13</sub> | CP <sub>14</sub> | CP <sub>15</sub> | NCP <sub>5</sub> | NCP <sub>6</sub> | NCP <sub>7</sub> | NCP <sub>8</sub> | NCP <sub>9</sub> | NCP <sub>10</sub> | NCP <sub>11</sub> | NCP <sub>12</sub> | NCP <sub>13</sub> | NCP <sub>14</sub> | NCP <sub>15</sub> | VMAT  | B-VMAT |
|-------------------|-----------------|-----------------|-----------------|-----------------|-----------------|------------------|------------------|------------------|------------------|------------------|------------------|------------------|------------------|------------------|------------------|------------------|-------------------|-------------------|-------------------|-------------------|-------------------|-------------------|-------|--------|
| CP <sub>5</sub>   | 1.9             | 0.1             | 0.1             | 0.1             | 0.2             | 0.2              | 0.2              | 0.2              | 0.3              | 0.3              | 0.3              | 0.2              | 0.3              | 0.3              | 0.4              | 0.4              | 0.4               | 0.4               | 0.4               | 0.4               | 0.5               | 0.5               | 0.2   | 0.4    |
| CP <sub>6</sub>   | 0.007           | 1.8             | 0.0             | 0.0             | 0.1             | 0.1              | 0.1              | 0.1              | 0.1              | 0.1              | 0.1              | 0.1              | 0.2              | 0.2              | 0.3              | 0.3              | 0.3               | 0.3               | 0.3               | 0.3               | 0.3               | 0.4               | 0.1   | 0.3    |
| CP <sub>7</sub>   | *               | *               | 1.8             | 0.0             | 0.1             | 0.1              | 0.1              | 0.1              | 0.1              | 0.1              | 0.1              | 0.1              | 0.2              | 0.2              | 0.3              | 0.3              | 0.3               | 0.3               | 0.3               | 0.3               | 0.3               | 0.4               | 0.1   | 0.3    |
| CP <sub>8</sub>   | 0.017           | *               | 0.012           | 1.8             | 0.0             | 0.1              | 0.1              | 0.1              | 0.1              | 0.1              | 0.1              | 0.1              | 0.1              | 0.2              | 0.2              | 0.3              | 0.3               | 0.3               | 0.3               | 0.3               | 0.3               | 0.3               | 0.1   | 0.3    |
| CP <sub>9</sub>   | 0.027           | *               | *               | *               | 1.8             | 0.1              | 0.1              | 0.1              | 0.1              | 0.1              | 0.1              | 0.0              | 0.1              | 0.1              | 0.2              | 0.2              | 0.2               | 0.3               | 0.3               | 0.3               | 0.3               | 0.3               | 0.1   | 0.3    |
| CP <sub>10</sub>  | 0.004           | 0.011           | <0.001          | 0.002           | 0.002           | 1.7              | 0.0              | 0.0              | 0.0              | 0.0              | 0.0              | -0.0             | 0.1              | 0.1              | 0.2              | 0.2              | 0.2               | 0.2               | 0.2               | 0.2               | 0.2               | 0.3               | 0.0   | 0.2    |
| CP <sub>11</sub>  | 0.003           | 0.002           | <0.001          | <0.001          | 0.004           | *                | 1.7              | 0.0              | 0.0              | 0.0              | 0.0              | -0.0             | 0.0              | 0.1              | 0.1              | 0.2              | 0.2               | 0.2               | 0.2               | 0.2               | 0.2               | 0.2               | -0.0  | 0.2    |
| CP <sub>12</sub>  | 0.004           | 0.002           | <0.001          | 0.002           | 0.004           | *                | *                | 1.7              | 0.0              | 0.0              | 0.0              | -0.0             | 0.0              | 0.1              | 0.1              | 0.1              | 0.2               | 0.2               | 0.2               | 0.2               | 0.2               | 0.2               | -0.0  | 0.2    |
| CP <sub>13</sub>  | 0.005           | 0.007           | <0.001          | 0.004           | 0.006           | *                | *                | *                | 1.7              | 0.0              | 0.0              | -0.0             | 0.0              | 0.1              | 0.1              | 0.1              | 0.2               | 0.2               | 0.2               | 0.2               | 0.2               | 0.2               | -0.0  | 0.2    |
| CP <sub>14</sub>  | 0.003           | 0.004           | <0.001          | 0.003           | 0.004           | *                | *                | *                | *                | 1.7              | 0.0              | -0.0             | 0.0              | 0.1              | 0.1              | 0.1              | 0.2               | 0.2               | 0.2               | 0.2               | 0.2               | 0.2               | -0.0  | 0.2    |
| CP <sub>15</sub>  | 0.004           | 0.004           | <0.001          | 0.010           | 0.010           | *                | *                | *                | *                | *                | 1.7              | -0.1             | 0.0              | 0.1              | 0.1              | 0.1              | 0.2               | 0.2               | 0.2               | 0.2               | 0.2               | 0.2               | -0.0  | 0.2    |
| NCP <sub>5</sub>  | 0.042           | *               | *               | *               | *               | *                | *                | *                | *                | *                | *                | 1.7              | 0.1              | 0.1              | 0.2              | 0.2              | 0.2               | 0.2               | 0.2               | 0.2               | 0.3               | 0.3               | 0.0   | 0.2    |
| NCP <sub>6</sub>  | 0.004           | 0.040           | 0.017           | 0.029           | 0.046           | *                | *                | *                | *                | *                | *                | *                | 1.7              | 0.0              | 0.1              | 0.1              | 0.1               | 0.1               | 0.1               | 0.1               | 0.2               | 0.2               | -0.1  | 0.2    |
| NCP <sub>7</sub>  | 0.006           | 0.015           | 0.013           | 0.025           | 0.026           | *                | *                | *                | *                | *                | *                | 0.036            | *                | 1.6              | 0.1              | 0.1              | 0.1               | 0.1               | 0.1               | 0.1               | 0.1               | 0.2               | -0.1  | 0.1    |
| NCP <sub>8</sub>  | 0.001           | 0.002           | 0.002           | 0.004           | 0.004           | 0.012            | 0.017            | 0.046            | *                | 0.047            | *                | *                | *                | *                | 1.6              | 0.0              | 0.0               | 0.0               | 0.1               | 0.1               | 0.1               | 0.1               | -0.2  | 0.1    |
| NCP <sub>9</sub>  | 0.002           | 0.005           | 0.004           | 0.005           | 0.006           | 0.014            | 0.011            | 0.013            | 0.021            | 0.020            | 0.022            | 0.033            | *                | 0.047            | *                | 1.6              | 0.0               | 0.0               | 0.0               | 0.1               | 0.1               | 0.1               | -0.2  | 0.0    |
| NCP <sub>10</sub> | <0.001          | 0.002           | 0.002           | 0.004           | 0.003           | 0.006            | 0.007            | 0.009            | 0.007            | 0.009            | 0.008            | 0.039            | *                | *                | *                | *                | 1.5               | 0.0               | 0.0               | 0.0               | 0.0               | 0.1               | -0.2  | 0.0    |
| NCP <sub>11</sub> | 0.001           | 0.003           | 0.002           | 0.005           | 0.004           | 0.010            | 0.007            | 0.010            | 0.009            | 0.009            | 0.013            | 0.049            | *                | *                | *                | *                | *                 | 1.5               | 0.0               | 0.0               | 0.0               | 0.0               | -0.2  | 0.0    |
| NCP <sub>12</sub> | <0.001          | 0.002           | 0.001           | 0.003           | 0.003           | 0.007            | 0.007            | 0.011            | 0.015            | 0.016            | 0.019            | 0.022            | 0.049            | *                | *                | *                | 0.040             | 1.5               | 0.0               | 0.0               | 0.0               | 0.0               | -0.2  | 0.0    |
| NCP <sub>13</sub> | <0.001          | 0.001           | <0.001          | <0.001          | <0.001          | 0.002            | 0.002            | 0.002            | 0.002            | 0.003            | 0.002            | 0.040            | *                | *                | *                | *                | *                 | *                 | 1.5               | 0.0               | 0.0               | 0.0               | -0.2  | -0.0   |
| NCP <sub>14</sub> | <0.001          | <0.001          | <0.001          | <0.001          | <0.001          | 0.002            | 0.001            | 0.002            | 0.002            | 0.003            | 0.003            | 0.007            | 0.024            | *                | *                | *                | *                 | *                 | *                 | 1.5               | 0.0               | 0.0               | -0.2  | -0.0   |
| NCP <sub>15</sub> | <0.001          | <0.001          | <0.001          | <0.001          | <0.001          | 0.002            | 0.003            | 0.004            | 0.004            | 0.004            | 0.004            | 0.025            | *                | *                | *                | *                | *                 | *                 | *                 | *                 | 1.5               | 0.0               | -0.2  | -0.0   |
| VMAT              | 0.006           | *               | 0.024           | *               | 0.048           | *                | *                | *                | *                | *                | *                | *                | *                | *                | 0.006            | 0.010            | 0.004             | 0.003             | 0.003             | 0.002             | 0.002             | 0.001             | 1.7   | 0.2    |
| B-VMAT            | <0.001          | <0.001          | <0.001          | <0.001          | <0.001          | <0.001           | 0.003            | 0.007            | 0.006            | 0.011            | 0.015            | 0.016            | *                | *                | *                | *                | *                 | *                 | *                 | *                 | *                 | *                 | 0.002 | 1.5    |

# Left Breast V4Gy (%)

## Treatment B

|                   | CP <sub>5</sub> | CP <sub>6</sub> | CP <sub>7</sub> | CP <sub>8</sub> | CP <sub>9</sub> | CP <sub>10</sub> | CP <sub>11</sub> | CP <sub>12</sub> | CP <sub>13</sub> | CP <sub>14</sub> | CP <sub>15</sub> | NCP <sub>5</sub> | NCP <sub>6</sub> | NCP <sub>7</sub> | NCP <sub>8</sub> | NCP <sub>9</sub> | NCP <sub>10</sub> | NCP <sub>11</sub> | NCP <sub>12</sub> | NCP <sub>13</sub> | NCP <sub>14</sub> | NCP <sub>15</sub> | VMAT   | B-VMAT |     |
|-------------------|-----------------|-----------------|-----------------|-----------------|-----------------|------------------|------------------|------------------|------------------|------------------|------------------|------------------|------------------|------------------|------------------|------------------|-------------------|-------------------|-------------------|-------------------|-------------------|-------------------|--------|--------|-----|
| CP <sub>5</sub>   | 12.3            | 0.1             | 0.8             | 1.1             | 1.1             | 1.2              | 1.3              | 1.5              | 1.6              | 1.7              | 1.5              | 1.7              | 1.5              | 2.2              | 2.1              | 2.2              | 2.5               | 2.8               | 2.9               | 2.7               | 2.5               | 2.4               | 1.5    | 5.0    |     |
| CP <sub>6</sub>   | *               | 12.2            | 0.7             | 1.0             | 1.0             | 1.1              | 1.2              | 1.3              | 1.4              | 1.6              | 1.4              | 1.6              | 1.4              | 2.0              | 2.0              | 2.1              | 2.4               | 2.6               | 2.8               | 2.6               | 2.3               | 2.2               | 1.4    | 4.8    |     |
| CP <sub>7</sub>   | *               | *               | 11.5            | 0.3             | 0.3             | 0.4              | 0.5              | 0.7              | 0.8              | 0.9              | 0.7              | 0.9              | 0.7              | 1.4              | 1.3              | 1.4              | 1.7               | 2.0               | 2.1               | 1.9               | 1.7               | 1.6               | 0.7    | 4.2    |     |
| CP <sub>8</sub>   | *               | *               | *               | 11.2            | -0.0            | 0.1              | 0.2              | 0.3              | 0.4              | 0.6              | 0.4              | 0.6              | 0.4              | 1.0              | 1.0              | 1.1              | 1.4               | 1.6               | 1.8               | 1.6               | 1.4               | 1.2               | 0.4    | 3.8    |     |
| CP <sub>9</sub>   | *               | *               | *               | *               | 11.2            | 0.1              | 0.2              | 0.4              | 0.5              | 0.6              | 0.4              | 0.6              | 0.4              | 1.0              | 1.0              | 1.1              | 1.4               | 1.7               | 1.8               | 1.6               | 1.4               | 1.3               | 0.4    | 3.9    |     |
| CP <sub>10</sub>  | *               | *               | *               | *               | *               | 11.1             | 0.1              | 0.3              | 0.4              | 0.5              | 0.3              | 0.6              | 0.4              | 1.0              | 1.0              | 1.1              | 1.3               | 1.6               | 1.7               | 1.5               | 1.3               | 1.2               | 0.3    | 3.8    |     |
| CP <sub>11</sub>  | *               | *               | *               | *               | *               | *                | 11.0             | 0.1              | 0.2              | 0.4              | 0.2              | 0.4              | 0.2              | 0.8              | 0.8              | 0.9              | 1.2               | 1.4               | 1.6               | 1.4               | 1.2               | 1.0               | 0.2    | 3.6    |     |
| CP <sub>12</sub>  | 0.040           | *               | *               | *               | *               | *                | *                | 10.8             | 0.1              | 0.2              | 0.0              | 0.3              | 0.1              | 0.7              | 0.7              | 0.8              | 1.0               | 1.3               | 1.4               | 1.2               | 1.0               | 0.9               | 0.1    | 3.5    |     |
| CP <sub>13</sub>  | 0.048           | *               | *               | *               | *               | *                | *                | *                | 10.7             | 0.1              | -0.1             | 0.2              | -0.0             | 0.6              | 0.6              | 0.7              | 0.9               | 1.2               | 1.3               | 1.1               | 0.9               | 0.8               | -0.0   | 3.4    |     |
| CP <sub>14</sub>  | 0.017           | 0.025           | 0.046           | *               | *               | *                | 0.048            | *                | *                | 10.6             | -0.2             | 0.0              | -0.2             | 0.5              | 0.4              | 0.5              | 0.8               | 1.1               | 1.2               | 1.0               | 0.8               | 0.7               | -0.2   | 3.3    |     |
| CP <sub>15</sub>  | 0.023           | 0.023           | *               | *               | *               | *                | *                | *                | *                | *                | 10.8             | 0.3              | 0.0              | 0.7              | 0.6              | 0.7              | 1.0               | 1.3               | 1.4               | 1.2               | 1.0               | 0.9               | 0.0    | 3.5    |     |
| NCP <sub>5</sub>  | *               | *               | *               | *               | *               | *                | *                | *                | *                | *                | *                | 10.5             | -0.2             | 0.4              | 0.4              | 0.5              | 0.8               | 1.0               | 1.2               | 0.9               | 0.7               | 0.6               | -0.2   | 3.2    |     |
| NCP <sub>6</sub>  | *               | *               | *               | *               | *               | *                | *                | *                | *                | *                | *                | *                | 10.8             | 0.6              | 0.6              | 0.7              | 1.0               | 1.2               | 1.4               | 1.2               | 0.9               | 0.8               | -0.0   | 3.4    |     |
| NCP <sub>7</sub>  | 0.048           | *               | *               | *               | *               | *                | *                | *                | *                | *                | *                | *                | *                | 10.1             | -0.0             | 0.1              | 0.4               | 0.6               | 0.8               | 0.5               | 0.3               | 0.2               | -0.6   | 2.8    |     |
| NCP <sub>8</sub>  | 0.040           | *               | 0.037           | *               | *               | *                | *                | *                | *                | *                | *                | *                | *                | *                | 10.2             | 0.1              | 0.4               | 0.6               | 0.8               | 0.6               | 0.3               | 0.2               | -0.6   | 2.8    |     |
| NCP <sub>9</sub>  | 0.030           | *               | *               | *               | *               | *                | *                | *                | *                | *                | *                | *                | *                | *                | *                | 10.1             | 0.3               | 0.5               | 0.7               | 0.5               | 0.2               | 0.1               | -0.7   | 2.7    |     |
| NCP <sub>10</sub> | 0.025           | 0.037           | 0.040           | *               | *               | *                | *                | *                | *                | *                | *                | *                | *                | *                | *                | *                | 9.8               | 0.3               | 0.4               | 0.2               | -0.0              | -0.1              | -1.0   | 2.5    |     |
| NCP <sub>11</sub> | 0.012           | 0.030           | 0.021           | *               | 0.048           | *                | *                | *                | *                | *                | *                | *                | *                | *                | *                | *                | 0.010             | 9.5               | 0.1               | -0.1              | -0.3              | -0.4              | -1.2   | 2.2    |     |
| NCP <sub>12</sub> | 0.011           | 0.023           | 0.028           | *               | 0.048           | 0.040            | 0.050            | *                | *                | *                | *                | *                | *                | *                | *                | *                | *                 | *                 | 9.4               | -0.2              | -0.4              | -0.5              | -1.4   | 2.1    |     |
| NCP <sub>13</sub> | 0.015           | 0.023           | 0.040           | *               | *               | *                | *                | *                | *                | *                | *                | *                | *                | *                | *                | *                | *                 | *                 | *                 | *                 | 9.6               | -0.2              | -0.3   | -1.2   | 2.3 |
| NCP <sub>14</sub> | 0.025           | 0.044           | *               | *               | *               | *                | *                | *                | *                | *                | *                | *                | *                | *                | *                | *                | *                 | *                 | *                 | *                 | 9.8               | -0.1              | -1.0   | 2.5    |     |
| NCP <sub>15</sub> | 0.026           | 0.044           | *               | *               | *               | *                | *                | *                | *                | *                | *                | *                | *                | *                | *                | *                | *                 | *                 | 0.030             | *                 | *                 | 9.9               | -0.8   | 2.6    |     |
| VMAT              | 0.019           | 0.024           | *               | *               | *               | *                | *                | *                | *                | *                | *                | *                | *                | *                | *                | *                | *                 | *                 | *                 | *                 | *                 | *                 | *      | 10.8   | 3.4 |
| B-VMAT            | <0.001          | <0.001          | <0.001          | <0.001          | <0.001          | <0.001           | <0.001           | 0.001            | 0.002            | 0.002            | 0.002            | 0.004            | 0.002            | 0.002            | 0.001            | <0.001           | 0.002             | 0.004             | 0.006             | 0.005             | 0.005             | 0.004             | <0.001 | 7.3    |     |

## Heart Dmean (Gy)

|                   |                  | Treatment B     |                 |                 |                 |                 |                  |                  |                  |                  |                  |                  |                  |                  |                  |                  |                  |                   |                   |                   |                   |                   |                   |      |        |      |
|-------------------|------------------|-----------------|-----------------|-----------------|-----------------|-----------------|------------------|------------------|------------------|------------------|------------------|------------------|------------------|------------------|------------------|------------------|------------------|-------------------|-------------------|-------------------|-------------------|-------------------|-------------------|------|--------|------|
| Treatment A       |                  | CP <sub>5</sub> | CP <sub>6</sub> | CP <sub>7</sub> | CP <sub>8</sub> | CP <sub>9</sub> | CP <sub>10</sub> | CP <sub>11</sub> | CP <sub>12</sub> | CP <sub>13</sub> | CP <sub>14</sub> | CP <sub>15</sub> | NCP <sub>5</sub> | NCP <sub>6</sub> | NCP <sub>7</sub> | NCP <sub>8</sub> | NCP <sub>9</sub> | NCP <sub>10</sub> | NCP <sub>11</sub> | NCP <sub>12</sub> | NCP <sub>13</sub> | NCP <sub>14</sub> | NCP <sub>15</sub> | VMAT | B-VMAT |      |
|                   | CP <sub>5</sub>  | 6.6             | 0.2             | 0.4             | 0.6             | 0.7             | 0.8              | 0.8              | 0.9              | 0.9              | 0.9              | 1.0              | 0.8              | 0.9              | 1.0              | 1.1              | 1.3              | 1.3               | 1.4               | 1.5               | 1.5               | 1.6               | 1.6               | 0.9  | 1.2    |      |
|                   | CP <sub>6</sub>  | <0.001          | 6.4             | 0.2             | 0.4             | 0.5             | 0.6              | 0.6              | 0.7              | 0.7              | 0.7              | 0.8              | 0.6              | 0.7              | 0.9              | 0.9              | 1.1              | 1.1               | 1.2               | 1.3               | 1.3               | 1.4               | 1.4               | 0.7  | 1.0    |      |
|                   | CP <sub>7</sub>  | <0.001          | <0.001          | 6.2             | 0.2             | 0.3             | 0.4              | 0.5              | 0.5              | 0.5              | 0.6              | 0.6              | 0.4              | 0.5              | 0.7              | 0.7              | 0.9              | 1.0               | 1.0               | 1.1               | 1.2               | 1.2               | 1.3               | 0.6  | 0.8    |      |
|                   | CP <sub>8</sub>  | <0.001          | <0.001          | <0.001          | 6.1             | 0.2             | 0.2              | 0.3              | 0.3              | 0.3              | 0.4              | 0.4              | 0.2              | 0.3              | 0.5              | 0.5              | 0.7              | 0.8               | 0.8               | 0.9               | 1.0               | 1.0               | 1.1               | 0.4  | 0.6    |      |
|                   | CP <sub>9</sub>  | <0.001          | <0.001          | <0.001          | <0.001          | 5.9             | 0.0              | 0.1              | 0.2              | 0.2              | 0.2              | 0.2              | 0.0              | 0.2              | 0.3              | 0.4              | 0.6              | 0.6               | 0.7               | 0.7               | 0.8               | 0.9               | 0.9               | 0.2  | 0.5    |      |
|                   | CP <sub>10</sub> | <0.001          | <0.001          | <0.001          | <0.001          | <0.002          | 5.9              | 0.1              | 0.1              | 0.1              | 0.2              | 0.2              | -0.0             | 0.1              | 0.3              | 0.3              | 0.5              | 0.6               | 0.6               | 0.7               | 0.8               | 0.8               | 0.9               | 0.2  | 0.4    |      |
|                   | CP <sub>11</sub> | <0.001          | <0.001          | <0.001          | <0.001          | <0.001          | <0.001           | 5.8              | 0.1              | 0.1              | 0.1              | 0.1              | -0.1             | 0.0              | 0.2              | 0.3              | 0.4              | 0.5               | 0.6               | 0.6               | 0.7               | 0.7               | 0.8               | 0.1  | 0.4    |      |
|                   | CP <sub>12</sub> | <0.001          | <0.001          | <0.001          | <0.001          | <0.001          | <0.001           | <0.001           | 5.7              | -0.0             | 0.0              | 0.1              | -0.2             | -0.0             | 0.1              | 0.2              | 0.4              | 0.4               | 0.5               | 0.6               | 0.6               | 0.7               | 0.7               | 0.0  | 0.3    |      |
|                   | CP <sub>13</sub> | <0.001          | <0.001          | <0.001          | <0.001          | <0.001          | <0.001           | 0.004            | 0.039            | 5.7              | 0.0              | 0.1              | -0.1             | -0.0             | 0.1              | 0.2              | 0.4              | 0.4               | 0.5               | 0.6               | 0.6               | 0.7               | 0.7               | 0.0  | 0.3    |      |
|                   | CP <sub>14</sub> | <0.001          | <0.001          | <0.001          | <0.001          | <0.001          | <0.001           | <0.001           | 0.023            | 0.003            | 5.7              | 0.0              | -0.2             | -0.1             | 0.1              | 0.2              | 0.3              | 0.4               | 0.4               | 0.5               | 0.6               | 0.6               | 0.7               | -0.0 | 0.3    |      |
|                   | CP <sub>15</sub> | <0.001          | <0.001          | <0.001          | <0.001          | <0.001          | <0.001           | <0.001           | 0.007            | <0.001           | 0.005            | 5.7              | -0.2             | -0.1             | 0.1              | 0.1              | 0.3              | 0.4               | 0.4               | 0.5               | 0.6               | 0.6               | 0.7               | -0.0 | 0.2    |      |
|                   | NCP <sub>5</sub> | <0.001          | <0.001          | 0.004           | *               | *               | *                | *                | *                | *                | *                | *                | 5.9              | 0.1              | 0.3              | 0.3              | 0.5              | 0.6               | 0.6               | 0.7               | 0.8               | 0.8               | 0.9               | 0.2  | 0.5    |      |
|                   | NCP <sub>6</sub> | <0.001          | <0.001          | <0.001          | 0.007           | 0.034           | *                | *                | *                | *                | *                | *                | 0.011            | 5.7              | 0.2              | 0.2              | 0.4              | 0.4               | 0.5               | 0.6               | 0.6               | 0.7               | 0.7               | 0.0  | 0.3    |      |
|                   | NCP <sub>7</sub> | <0.001          | <0.001          | <0.001          | <0.001          | 0.002           | 0.006            | 0.009            | 0.041            | *                | *                | *                | *                | <0.001           | <0.001           | 5.6              | 0.1              | 0.2               | 0.3               | 0.3               | 0.4               | 0.5               | 0.5               | 0.6  | -0.1   | 0.2  |
|                   | NCP <sub>8</sub> | <0.001          | <0.001          | <0.001          | <0.001          | <0.001          | <0.001           | 0.002            | 0.007            | 0.046            | 0.036            | 0.048            | *                | <0.001           | <0.001           | 0.003            | 5.5              | 0.2               | 0.2               | 0.3               | 0.4               | 0.4               | 0.5               | 0.5  | 0.6    | -0.2 |
| NCP <sub>9</sub>  | <0.001           | <0.001          | <0.001          | <0.001          | <0.001          | <0.001          | <0.001           | <0.001           | <0.001           | <0.001           | 0.001            | <0.001           | <0.001           | <0.001           | <0.001           | 5.4              | 0.1              | 0.1               | 0.2               | 0.3               | 0.3               | 0.4               | -0.3              | -0.1 |        |      |
| NCP <sub>10</sub> | <0.001           | <0.001          | <0.001          | <0.001          | <0.001          | <0.001          | <0.001           | <0.001           | <0.001           | <0.001           | 0.001            | <0.001           | <0.001           | <0.001           | <0.001           | 0.002            | 5.3              | 0.1               | 0.1               | 0.2               | 0.3               | 0.3               | -0.4              | -0.1 |        |      |
| NCP <sub>11</sub> | <0.001           | <0.001          | <0.001          | <0.001          | <0.001          | <0.001          | <0.001           | 0.001            | <0.001           | <0.001           | <0.001           | <0.001           | <0.001           | <0.001           | <0.001           | 0.002            | <0.001           | 5.2               | 0.1               | 0.1               | 0.2               | 0.2               | -0.5              | -0.2 |        |      |
| NCP <sub>12</sub> | <0.001           | <0.001          | <0.001          | <0.001          | <0.001          | <0.001          | <0.001           | <0.001           | <0.001           | <0.001           | 0.001            | <0.001           | <0.001           | <0.001           | <0.001           | 0.002            | <0.001           | 0.003             | 5.2               | 0.1               | 0.1               | 0.2               | -0.5              | -0.2 |        |      |
| NCP <sub>13</sub> | <0.001           | <0.001          | <0.001          | <0.001          | <0.001          | <0.001          | <0.001           | <0.001           | <0.001           | <0.001           | <0.001           | <0.001           | <0.001           | <0.001           | <0.001           | 0.001            | <0.001           | <0.001            | <0.001            | 5.1               | 0.1               | 0.1               | -0.6              | -0.3 |        |      |
| NCP <sub>14</sub> | <0.001           | <0.001          | <0.001          | <0.001          | <0.001          | <0.001          | <0.001           | <0.001           | <0.001           | <0.001           | <0.001           | <0.001           | <0.001           | <0.001           | <0.001           | <0.001           | <0.001           | <0.001            | <0.001            | <0.001            | 5.0               | 0.0               | -0.7              | -0.4 |        |      |
| NCP <sub>15</sub> | <0.001           | <0.001          | <0.001          | <0.001          | <0.001          | <0.001          | <0.001           | <0.001           | <0.001           | <0.001           | <0.001           | <0.001           | <0.001           | <0.001           | <0.001           | <0.001           | <0.001           | <0.001            | <0.001            | <0.001            | <0.001            | 0.001             | 5.0               | -0.7 | -0.4   |      |
| VMAT              | <0.001           | <0.001          | <0.001          | <0.001          | 0.004           | 0.020           | *                | *                | *                | *                | *                | *                | *                | *                | *                | 0.001            | <0.001           | <0.001            | <0.001            | <0.001            | <0.001            | <0.001            | <0.001            | 5.7  | 0.3    |      |
| B-VMAT            | <0.001           | <0.001          | <0.001          | <0.001          | <0.001          | 0.001           | 0.002            | 0.004            | 0.002            | 0.003            | 0.005            | 0.004            | 0.017            | *                | *                | *                | *                | *                 | 0.036             | 0.009             | 0.003             | 0.002             | 0.004             | 5.4  |        |      |

## Lungs Dmean (Gy)

|                   |                  | Treatment B     |                 |                 |                 |                 |                  |                  |                  |                  |                  |                  |                  |                  |                  |                  |                  |                   |                   |                   |                   |                   |                   |      |        |     |
|-------------------|------------------|-----------------|-----------------|-----------------|-----------------|-----------------|------------------|------------------|------------------|------------------|------------------|------------------|------------------|------------------|------------------|------------------|------------------|-------------------|-------------------|-------------------|-------------------|-------------------|-------------------|------|--------|-----|
| Treatment A       |                  | CP <sub>5</sub> | CP <sub>6</sub> | CP <sub>7</sub> | CP <sub>8</sub> | CP <sub>9</sub> | CP <sub>10</sub> | CP <sub>11</sub> | CP <sub>12</sub> | CP <sub>13</sub> | CP <sub>14</sub> | CP <sub>15</sub> | NCP <sub>5</sub> | NCP <sub>6</sub> | NCP <sub>7</sub> | NCP <sub>8</sub> | NCP <sub>9</sub> | NCP <sub>10</sub> | NCP <sub>11</sub> | NCP <sub>12</sub> | NCP <sub>13</sub> | NCP <sub>14</sub> | NCP <sub>15</sub> | VMAT | B-VMAT |     |
|                   | CP <sub>5</sub>  | 8.6             | 0.3             | 0.5             | 0.7             | 0.8             | 0.9              | 1.0              | 1.1              | 1.1              | 1.2              | 1.2              | 0.4              | 0.7              | 0.9              | 1.2              | 1.3              | 1.4               | 1.5               | 1.5               | 1.6               | 1.7               | 1.7               | 1.1  | 1.4    |     |
|                   | CP <sub>6</sub>  | <0.001          | 8.3             | 0.2             | 0.4             | 0.5             | 0.6              | 0.7              | 0.7              | 0.8              | 0.9              | 0.9              | 0.1              | 0.4              | 0.6              | 0.9              | 1.0              | 1.1               | 1.2               | 1.2               | 1.3               | 1.3               | 1.4               | 0.8  | 1.1    |     |
|                   | CP <sub>7</sub>  | <0.001          | <0.001          | 8.1             | 0.2             | 0.3             | 0.4              | 0.4              | 0.5              | 0.6              | 0.6              | 0.7              | -0.1             | 0.2              | 0.4              | 0.6              | 0.8              | 0.8               | 0.9               | 1.0               | 1.1               | 1.1               | 1.2               | 0.6  | 0.9    |     |
|                   | CP <sub>8</sub>  | <0.001          | <0.001          | <0.001          | 7.9             | 0.1             | 0.2              | 0.3              | 0.4              | 0.4              | 0.5              | 0.5              | -0.3             | 0.0              | 0.2              | 0.5              | 0.6              | 0.7               | 0.8               | 0.8               | 0.9               | 1.0               | 1.0               | 0.4  | 0.7    |     |
|                   | CP <sub>9</sub>  | <0.001          | <0.001          | <0.001          | <0.001          | 7.8             | 0.1              | 0.2              | 0.2              | 0.3              | 0.4              | 0.4              | -0.4             | -0.1             | 0.1              | 0.4              | 0.5              | 0.6               | 0.7               | 0.7               | 0.8               | 0.9               | 0.9               | 0.3  | 0.6    |     |
|                   | CP <sub>10</sub> | <0.001          | <0.001          | <0.001          | <0.001          | <0.001          | 7.7              | 0.1              | 0.1              | 0.2              | 0.3              | 0.3              | -0.5             | -0.2             | 0.0              | 0.3              | 0.4              | 0.5               | 0.6               | 0.6               | 0.7               | 0.8               | 0.8               | 0.2  | 0.5    |     |
|                   | CP <sub>11</sub> | <0.001          | <0.001          | <0.001          | <0.001          | <0.001          | <0.001           | 7.6              | 0.1              | 0.1              | 0.2              | 0.2              | -0.6             | -0.3             | -0.0             | 0.2              | 0.3              | 0.4               | 0.5               | 0.6               | 0.6               | 0.7               | 0.7               | 0.2  | 0.4    |     |
|                   | CP <sub>12</sub> | <0.001          | <0.001          | <0.001          | <0.001          | <0.001          | <0.001           | <0.001           | 7.5              | 0.1              | 0.1              | 0.2              | -0.6             | -0.3             | -0.1             | 0.1              | 0.2              | 0.3               | 0.4               | 0.5               | 0.6               | 0.6               | 0.7               | 0.1  | 0.4    |     |
|                   | CP <sub>13</sub> | <0.001          | <0.001          | <0.001          | <0.001          | <0.001          | <0.001           | <0.001           | <0.001           | 7.5              | 0.1              | 0.1              | -0.7             | -0.4             | -0.2             | 0.1              | 0.2              | 0.3               | 0.4               | 0.4               | 0.5               | 0.5               | 0.6               | 0.0  | 0.3    |     |
|                   | CP <sub>14</sub> | <0.001          | <0.001          | <0.001          | <0.001          | <0.001          | <0.001           | <0.001           | <0.001           | <0.001           | 7.4              | 0.0              | -0.8             | -0.5             | -0.2             | 0.0              | 0.1              | 0.2               | 0.3               | 0.4               | 0.4               | 0.5               | 0.5               | -0.0 | 0.2    |     |
|                   | CP <sub>15</sub> | <0.001          | <0.001          | <0.001          | <0.001          | <0.001          | <0.001           | <0.001           | <0.001           | <0.001           | 0.001            | 0.019            | 7.4              | -0.8             | -0.5             | -0.3             | -0.0             | 0.1               | 0.2               | 0.3               | 0.3               | 0.4               | 0.5               | 0.5  | -0.1   | 0.2 |
|                   | NCP <sub>5</sub> | 0.014           | *               | *               | 0.040           | 0.013           | 0.003            | 0.001            | <0.001           | <0.001           | <0.001           | <0.001           | 8.2              | 0.3              | 0.5              | 0.8              | 0.9              | 1.0               | 1.1               | 1.1               | 1.2               | 1.3               | 1.3               | 0.7  | 1.0    |     |
|                   | NCP <sub>6</sub> | <0.001          | 0.001           | *               | *               | *               | *                | *                | 0.011            | 0.004            | 0.001            | <0.001           | <0.001           | 7.9              | 0.2              | 0.5              | 0.6              | 0.7               | 0.8               | 0.8               | 0.9               | 0.9               | 1.0               | 0.4  | 0.7    |     |
|                   | NCP <sub>7</sub> | <0.001          | <0.001          | 0.002           | 0.034           | *               | *                | *                | *                | *                | 0.020            | 0.010            | <0.001           | <0.001           | 7.7              | 0.2              | 0.4              | 0.4               | 0.5               | 0.6               | 0.7               | 0.7               | 0.8               | 0.2  | 0.5    |     |
|                   | NCP <sub>8</sub> | <0.001          | <0.001          | <0.001          | <0.001          | 0.004           | *                | *                | *                | *                | *                | *                | <0.001           | <0.001           | <0.001           | 7.4              | 0.1              | 0.2               | 0.3               | 0.4               | 0.4               | 0.5               | 0.5               | -0.1 | 0.2    |     |
| NCP <sub>9</sub>  | <0.001           | <0.001          | <0.001          | <0.001          | <0.001          | <0.001          | 0.005            | *                | *                | *                | *                | <0.001           | <0.001           | <0.001           | <0.001           | 7.3              | 0.1              | 0.2               | 0.2               | 0.3               | 0.4               | 0.4               | -0.2              | 0.1  |        |     |
| NCP <sub>10</sub> | <0.001           | <0.001          | <0.001          | <0.001          | <0.001          | <0.001          | <0.001           | 0.005            | 0.048            | *                | *                | <0.001           | <0.001           | <0.001           | <0.001           | <0.001           | 7.2              | 0.1               | 0.2               | 0.2               | 0.3               | 0.3               | -0.3              | 0.0  |        |     |
| NCP <sub>11</sub> | <0.001           | <0.001          | <0.001          | <0.001          | <0.001          | <0.001          | <0.001           | <0.001           | 0.005            | 0.011            | 0.021            | <0.001           | <0.001           | <0.001           | <0.001           | <0.001           | <0.001           | <0.001            | 7.1               | 0.1               | 0.1               | 0.2               | 0.2               | -0.4 | -0.1   |     |
| NCP <sub>12</sub> | <0.001           | <0.001          | <0.001          | <0.001          | <0.001          | <0.001          | <0.001           | <0.001           | 0.001            | 0.002            | 0.003            | <0.001           | <0.001           | <0.001           | <0.001           | <0.001           | <0.001           | <0.001            | 0.013             | 7.1               | 0.1               | 0.1               | 0.2               | -0.4 | -0.1   |     |
| NCP <sub>13</sub> | <0.001           | <0.001          | <0.001          | <0.001          | <0.001          | <0.001          | <0.001           | <0.001           | <0.001           | <0.001           | <0.001           | <0.001           | <0.001           | <0.001           | <0.001           | <0.001           | <0.001           | <0.001            | <0.001            | <0.001            | 7.0               | 0.0               | 0.1               | -0.5 | -0.2   |     |
| NCP <sub>14</sub> | <0.001           | <0.001          | <0.001          | <0.001          | <0.001          | <0.001          | <0.001           | <0.001           | <0.001           | <0.001           | <0.001           | <0.001           | <0.001           | <0.001           | <0.001           | <0.001           | <0.001           | <0.001            | <0.001            | <0.001            | <0.001            | 6.9               | 0.1               | -0.5 | -0.2   |     |
| NCP <sub>15</sub> | <0.001           | <0.001          | <0.001          | <0.001          | <0.001          | <0.001          | <0.001           | <0.001           | <0.001           | <0.001           | <0.001           | <0.001           | <0.001           | <0.001           | <0.001           | <0.001           | <0.001           | <0.001            | <0.001            | <0.001            | <0.001            | <0.001            | 6.9               | -0.6 | -0.3   |     |
| VMAT              | <0.001           | <0.001          | <0.001          | <0.001          | <0.001          | 0.003           | 0.013            | *                | *                | *                | 0.033            | <0.001           | 0.008            | *                | *                | *                | 0.025            | 0.002             | <0.001            | <0.001            | <0.001            | <0.001            | 7.5               | 0.3  |        |     |
| B-VMAT            | <0.001           | <0.001          | <0.001          | <0.001          | <0.00           |                 |                  |                  |                  |                  |                  |                  |                  |                  |                  |                  |                  |                   |                   |                   |                   |                   |                   |      |        |     |





### Patient V5Gy (cc)

#### Treatment B

|                   | CP <sub>5</sub> | CP <sub>6</sub> | CP <sub>7</sub> | CP <sub>8</sub> | CP <sub>9</sub> | CP <sub>10</sub> | CP <sub>11</sub> | CP <sub>12</sub> | CP <sub>13</sub> | CP <sub>14</sub> | CP <sub>15</sub> | NCP <sub>5</sub> | NCP <sub>6</sub> | NCP <sub>7</sub> | NCP <sub>8</sub> | NCP <sub>9</sub> | NCP <sub>10</sub> | NCP <sub>11</sub> | NCP <sub>12</sub> | NCP <sub>13</sub> | NCP <sub>14</sub> | NCP <sub>15</sub> | VMAT   | B-VMAT |       |       |
|-------------------|-----------------|-----------------|-----------------|-----------------|-----------------|------------------|------------------|------------------|------------------|------------------|------------------|------------------|------------------|------------------|------------------|------------------|-------------------|-------------------|-------------------|-------------------|-------------------|-------------------|--------|--------|-------|-------|
| CP <sub>5</sub>   | 5246.4          | 70.0            | 185.6           | 265.3           | 329.2           | 3319.7           | 339.4            | 355.2            | 373.3            | 435.5            | 237.3            | 4386.4           | 362.2            | 327.1            | 8298.4           | 4384.5           | 5420.6            | 645.2             | 1497.6            | 6530.3            | 3539.3            | 3556.4            | 560.8  | 0581.9 | 170.8 | 055.4 |
| CP <sub>6</sub>   | *               | 5176.1          | 115.7           | 195.3           | 322.2           | 3249.8           | 269.5            | 528.5            | 230.3            | 531.6            | 529.2            | 4201.8           | 228.4            | 4314.6           | 6350.7           | 7382.2           | 2427.6            | 6460.4            | 4469.3            | 3486.4            | 4490.1            | 1511.9            | 100.8  | 898.5  | 4     |       |
| CP <sub>7</sub>   | 0.006           | 0.005           | 5061.7          | 79.6            | 106.6           | 134.1            | 115.3            | 816.9            | 5187.8           | 200.8            | 8176.7           | 86.1             | 112.7            | 198.9            | 235.0            | 266.5            | 5311.9            | 9344.7            | 7353.6            | 6370.8            | 8374.4            | 4396.2            | -14.9  | 9869.8 | 8     |       |
| CP <sub>8</sub>   | 0.001           | <0.001          | 0.007           | 4981.2          | 27.0            | 54.4             | 74.2             | 89.9             | 108.2            | 212.1            | 197.1            | 6.5              | 33.1             | 119.2            | 155.3            | 186.8            | 232.3             | 326.5             | 1274.0            | 0291.2            | 1294.7            | 7316.6            | -94.5  | 5790.1 | 1     |       |
| CP <sub>9</sub>   | 0.001           | <0.001          | 0.009           | *               | 4954.4          | 27.4             | 47.2             | 62.9             | 81.1             | 94.1             | 70.1             | -20.5            | 6.1              | 92.2             | 128.3            | 159.8            | 205.3             | 238.0             | 247.0             | 264.4             | 1267.7            | 7289.6            | 121.5  | 5763.1 | 1     |       |
| CP <sub>10</sub>  | <0.001          | <0.001          | 0.003           | *               | 4927.4          | 19.7             | 35.5             | 53.7             | 66.7             | 42.6             | -48.0            | -21.3            | 64.8             | 100.9            | 132.4            | 177.9            | 210.6             | 219.6             | 236.7             | 724.0             | 3262.2            | 148.5             | 5735.7 | 1      |       |       |
| CP <sub>11</sub>  | <0.001          | <0.001          | <0.001          | 0.015           | *               | 0.026            | 4907.4           | 15.7             | 34.0             | 47.0             | 22.9             | -67.7            | -41.1            | 45.1             | 81.2             | 112.7            | 158.1             | 190.9             | 199.8             | 216.9             | 220.6             | 242.4             | 168.7  | 716.0  | 1     |       |
| CP <sub>12</sub>  | <0.001          | <0.001          | <0.001          | 0.007           | *               | *                | 4891.7           | 18.3             | 31.3             | 7.2              | -83.4            | -56.8            | 29.4             | 65.5             | 97.0             | 142.4            | 175.2             | 218.4             | 1201.2            | 2204.8            | 8226.7            | 184.7             | 700.2  | 1      |       |       |
| CP <sub>13</sub>  | <0.001          | <0.001          | 0.001           | 0.001           | 0.025           | 0.013            | *                | 4873.3           | 13.0             | -11.1            | 101.7            | -75.1            | 11.1             | 47.2             | 78.7             | 124.1            | 156.9             | 165.8             | 183.0             | 186.6             | 208.5             | 202.6             | 682.0  | 1      |       |       |
| CP <sub>14</sub>  | <0.001          | <0.001          | 0.001           | 0.002           | 0.013           | 0.015            | *                | *                | 4860.3           | -24.1            | 114.7            | -88.0            | -1.9             | 34.2             | 65.7             | 111.1            | 143.9             | 152.9             | 170.0             | 173.6             | 195.5             | 215.6             | 669.0  | 1      |       |       |
| CP <sub>15</sub>  | <0.001          | <0.001          | <0.001          | 0.005           | 0.032           | *                | *                | *                | 4884.4           | -90.6            | -64.0            | 22.2             | 58.3             | 89.8             | 135.2            | 168.0            | 176.9             | 194.4             | 1197.7            | 7219.5            | 191.6             | 693.1             | 1      |        |       |       |
| NCP <sub>5</sub>  | 0.001           | 0.012           | *               | *               | *               | *                | *                | *                | *                | *                | 4975.5           | 26.6             | 112.8            | 148.9            | 180.4            | 225.8            | 258.6             | 267.5             | 284.6             | 288.2             | 310.1             | 101.7             | 783.6  | 1      |       |       |
| NCP <sub>6</sub>  | 0.001           | 0.017           | *               | *               | *               | *                | *                | *                | *                | *                | 4948.1           | 86.1             | 122.2            | 153.7            | 199.2            | 232.0            | 240.9             | 258.0             | 261.6             | 283.5             | 127.6             | 757.0             | 1      |        |       |       |
| NCP <sub>7</sub>  | 0.001           | 0.006           | *               | *               | *               | *                | *                | *                | *                | *                | 0.013            | 0.017            | 4862.3           | 36.1             | 67.6             | 113.1            | 145.8             | 154.8             | 171.9             | 197.5             | 5197.4            | 213.6             | 767.9  | 1      |       |       |
| NCP <sub>8</sub>  | <0.001          | <0.001          | 0.015           | *               | *               | *                | *                | *                | *                | *                | 0.007            | 0.002            | 4826.3           | 31.5             | 76.9             | 109.7            | 118.7             | 133.9             | 416.1             | 3249.8            | 634.8             | 1                 | 1      |        |       |       |
| NCP <sub>9</sub>  | <0.001          | <0.001          | 0.004           | 0.048           | *               | *                | *                | *                | *                | *                | 0.003            | 0.001            | 0.014            | 4794.1           | 45.4             | 78.2             | 87.2              | 104.3             | 3107.9            | 929.8             | 281.6             | 360.3             | 1      |        |       |       |
| NCP <sub>10</sub> | <0.001          | <0.001          | 0.003           | 0.025           | *               | *                | *                | *                | *                | *                | <0.001           | <0.001           | 0.003            | *                | 4749.3           | 32.8             | 41.7              | 58.8              | 62.4              | 84.3              | 326.8             | 557.8             | 1      |        |       |       |
| NCP <sub>11</sub> | <0.001          | <0.001          | 0.002           | 0.009           | 0.025           | 0.026            | 0.026            | 0.028            | *                | *                | 0.042            | <0.001           | <0.001           | 0.001            | 0.035            | *                | 0.004             | 4716.1            | 8.9               | 26.1              | 29.7              | 51.6              | 359.5  | 25.1   |       |       |
| NCP <sub>12</sub> | <0.001          | <0.001          | 0.001           | 0.004           | 0.012           | 0.014            | 0.030            | 0.026            | 0.045            | *                | 0.025            | <0.001           | <0.001           | 0.001            | 0.019            | 0.026            | 0.037             | *                 | 4707.1            | 17.1              | 20.7              | 42.6              | 368.5  | 16.1   |       |       |
| NCP <sub>13</sub> | <0.001          | <0.001          | <0.001          | 0.005           | 0.016           | 0.013            | 0.023            | 0.021            | *                | *                | 0.023            | <0.001           | <0.001           | <0.001           | 0.006            | 0.005            | 0.009             | *                 | 4690.1            | 3.6               | 25.5              | 38.5              | 649.0  | 1      |       |       |
| NCP <sub>14</sub> | <0.001          | <0.001          | <0.001          | 0.003           | 0.007           | 0.006            | 0.009            | 0.012            | 0.025            | 0.048            | 0.013            | <0.001           | <0.001           | <0.001           | 0.004            | 0.003            | 0.010             | *                 | *                 | 4686.1            | 21.9              | 389.4             | 295.4  | 1      |       |       |
| NCP <sub>15</sub> | <0.001          | <0.001          | <0.001          | <0.001          | 0.002           | 0.003            | 0.006            | 0.005            | 0.009            | 0.009            | 0.006            | <0.001           | <0.001           | <0.001           | 0.002            | <0.001           | 0.003             | 0.021             | 0.028             | *                 | 4665.1            | 411.4             | 373.5  | 1      |       |       |
| VMAT              | *               | *               | *               | 0.040           | 0.011           | 0.012            | 0.001            | <0.001           | <0.001           | <0.001           | <0.001           | *                | *                | 0.007            | 0.002            | <0.001           | <0.001            | <0.001            | <0.001            | <0.001            | <0.001            | <0.001            | <0.001 | 076.8  | 384.6 |       |
| B-VMAT            | <0.001          | <0.001          | <0.001          | <0.001          | <0.001          | <0.001           | <0.001           | <0.001           | <0.001           | <0.001           | <0.001           | <0.001           | <0.001           | <0.001           | <0.001           | <0.001           | <0.001            | <0.001            | <0.001            | <0.001            | <0.001            | <0.001            | <0.001 | 0004   | 191.5 |       |

### Patient V20Gy (cc)

#### Treatment B

|                   | CP <sub>5</sub> | CP <sub>6</sub> | CP <sub>7</sub> | CP <sub>8</sub> | CP <sub>9</sub> | CP <sub>10</sub> | CP <sub>11</sub> | CP <sub>12</sub> | CP <sub>13</sub> | CP <sub>14</sub> | CP <sub>15</sub> | NCP <sub>5</sub> | NCP <sub>6</sub> | NCP <sub>7</sub> | NCP <sub>8</sub> | NCP <sub>9</sub> | NCP <sub>10</sub> | NCP <sub>11</sub> | NCP <sub>12</sub> | NCP <sub>13</sub> | NCP <sub>14</sub> | NCP <sub>15</sub> | VMAT   | B-VMAT |
|-------------------|-----------------|-----------------|-----------------|-----------------|-----------------|------------------|------------------|------------------|------------------|------------------|------------------|------------------|------------------|------------------|------------------|------------------|-------------------|-------------------|-------------------|-------------------|-------------------|-------------------|--------|--------|
| CP <sub>5</sub>   | 2050.1          | 107.9           | 158.5           | 519.2           | 723.2           | 2267.5           | 529.1            | 530.6            | 832.7            | 934.7            | 6369.8           | 9.7              | 115.8            | 166.1            | 121.5            | 224.5            | 827.7             | 5311.0            | 339.9             | 937.3             | 6399.5            | 5425.9            | 938.5  | 4-60.7 |
| CP <sub>6</sub>   | <0.001          | 1943.1          | 50.6            | 84.8            | 124.3           | 159.6            | 183.6            | 199.0            | 220.2            | 0239.7           | 261.9            | 98.2             | 7.9              | 58.2             | 107.4            | 137.9            | 169.6             | 203.1             | 232.0             | 265.7             | 729.1             | 6318.0            | 277.5  | 168.6  |
| CP <sub>7</sub>   | <0.001          | 0.002           | 892.7           | 34.2            | 73.6            | 109.0            | 133.0            | 148.3            | 169.4            | 189.2            | 211.3            | 148.4            | -42.8            | 7.5              | 56.7             | 87.3             | 119.0             | 152.4             | 181.4             | 215.1             | 241.0             | 267.7             | 322.6  | 821.9  |
| CP <sub>8</sub>   | <0.001          | <0.001          | <0.001          | 1858.1          | 39.5            | 74.8             | 98.8             | 114.2            | 135.2            | 215.4            | 917.7            | 118.3            | -76.9            | -26.6            | 22.6             | 53.1             | 84.8              | 118.3             | 147.2             | 218.0             | 920.6             | 823.3             | 219.2  | 725.4  |
| CP <sub>9</sub>   | <0.001          | <0.001          | <0.001          | <0.001          | 1818.1          | 35.4             | 59.4             | 74.7             | 95.7             | 115.4            | 137.7            | 222.4            | -116.4           | -66.1            | -16.9            | 13.6             | 45.3              | 78.8              | 107.8             | 141.4             | 167.7             | 419.3             | 715.3  | 229.9  |
| CP <sub>10</sub>  | <0.001          | <0.001          | <0.001          | <0.001          | 0.017           | 1783.4           | 24.0             | 39.3             | 60.4             | 80.0             | 102.3            | 257.4            | 151.1            | 101.1            | -52.3            | -21.7            | 10.0              | 43.4              | 72.4              | 106.1             | 132.0             | 158.3             | 117.8  | 328.3  |
| CP <sub>11</sub>  | <0.001          | <0.001          | <0.001          | <0.001          | 0.002           | 0.003            | 1759.4           | 15.3             | 36.4             | 56.0             | 78.3             | 281.4            | 175.1            | 125.1            | -76.3            | -45.7            | -14.0             | 19.4              | 48.4              | 82.1              | 108.0             | 134.3             | 93.8   | 352.3  |
| CP <sub>12</sub>  | <0.001          | <0.001          | <0.001          | <0.001          | <0.001          | <0.001           | 0.005            | 1744.1           | 21.1             | 40.7             | 63.0             | 297.3            | 191.3            | 140.1            | -91.6            | -61.1            | -29.4             | 4.1               | 33.1              | 66.7              | 92.7              | 119.0             | 78.5   | 367.6  |
| CP <sub>13</sub>  | <0.001          | <0.001          | <0.001          | <0.001          | <0.001          | <0.001           | <0.001           | 1723.1           | 19.7             | 41.9             | 318.2            | 212.3            | 161.1            | 112.7            | -82.1            | -50.4            | -16.9             | 12.0              | 45.7              | 71.6              | 98.0              | 57.5              | 388.6  | 1      |
| CP <sub>14</sub>  | <0.001          | <0.001          | <0.001          | <0.001          | <0.001          | <0.001           | <0.001           | <0.001           | 1703.1           | 22.3             | 337.4            | 231.1            | 181.1            | 132.1            | 101.1            | -70.1            | -36.6             | -7.6              | 26.0              | 52.0              | 78.3              | 37.8              | 408.3  | 1      |
| CP <sub>15</sub>  | <0.001          | <0.001          | <0.001          | <0.001          | <0.001          | <0.001           | <0.001           | <0.001           | <0.001           | <0.001           | 1681.1           | 36.0             | 125.4            | 120.3            | 154.1            | 124.1            | -92.3             | -58.9             | -29.9             | 3.8               | 29.7              | 56.0              | 15.5   | 430.6  |
| NCP <sub>5</sub>  | *               | <0.001          | <0.001          | <0.001          | <0.001          | <0.001           | <0.001           | <0.001           | <0.001           | <0.001           | <0.001           | 0.041            | 0.106            | 0.156            | 320.5            | 523.6            | 1267.7            | 730.1             | 2330.0            | 2363.9            | 9389.8            | 8416.1            | 1375.6 | 70.5   |
| NCP <sub>6</sub>  | <0.001          | *               | *               | 0.003           | <0.001          | <0.001           | <0.001           | <0.001           | <0.001           | <0.001           | <0.001           | <0.001           | 1935.1           | 50.3             | 99.5             | 130.0            | 161.7             | 195.5             | 222.4             | 225.7             | 828.3             | 8310.1            | 1269.6 | 176.5  |
| NCP <sub>7</sub>  | <0.001          | *               | *               | 0.016           | 0.002           | <0.001           | <0.001           | <0.001           | <0.001           | <0.001           | <0.001           | <0.001           | <0.001           | 1884.1           | 49.2             | 79.7             | 111.4             | 144.4             | 917.3             | 920.7             | 523.3             | 5259.8            | 8219.3 | 322.8  |
| NCP <sub>8</sub>  | <0.001          | <0.001          | 0.016           | *               | *               | 0.035            | 0.006            | 0.002            | <0.001           | <0.001           | <0.001           | <0.001           | <0.001           | <0.001           | 1835.1           | 30.5             | 62.2              | 95.7              | 124.7             | 158.3             | 318.4             | 3210.6            | 1710.2 | 1276.0 |
| NCP <sub>9</sub>  | <0.001          | <0.001          | 0.002           | 0.017           | *               | *                | *                | 0.014            | 0.002            | <0.001           | <0.001           | <0.001           | <0.001           | <0.001           | 0.001            | 1805.1           | 31.7              | 65.2              | 94.1              | 127.8             | 153.7             | 180.1             | 1139.6 | 306.5  |
| NCP <sub>10</sub> | <0.001          | <0.001          | <0.001          | 0.003           | *               | *                | *                | *                | *                | *                | 0.007            | <0.001           | <0.001           | <0.001           | <0.001           | <0.001           | 1773.1            | 33.5              | 62.4              | 96.1              | 122.0             | 148.4             | 107.9  | 938.2  |
| NCP <sub>11</sub> | <0.001          | <0.001          | <0.001          | <0.001          | 0.007           | *                |                  |                  |                  |                  |                  |                  |                  |                  |                  |                  |                   |                   |                   |                   |                   |                   |        |        |

- [1] Breedveld S, Storchi P, Voet P, and Heijmen B. iCycle: Integrated, multicriterial beam angle, and profile optimization for generation of coplanar and noncoplanar IMRT plans. *Med. Phys.*, 2012;39:951–963.
- [2] Voet P, Dirkx M, Breedveld S, Fransen D, Levendag P, and Heijmen B. Towards fully automated multi-criterial plan generation: a prospective clinical study. *Int. J. Radiat. Oncol. Biol. Phys.*, 2013;85:866–872.
- [3] Breedveld S, Storchi P, and Heijmen B. The equivalence of multi-criteria methods for radiotherapy plan optimization. *Phys. Med. Biol.*, 2009;54:7199–7209.
- [4] Hussein M, Heijmen B. J. M, Verellen D, and Nisbet A. Automation in intensity modulated radiotherapy treatment planning-a review of recent innovations. *Br J Radiol*, 2018;91:20180270.
- [5] Voet P, Dirkx M, Breedveld S, Al-Mamgani A, Incrocci L, and Heijmen B. Fully automated VMAT plan generation for prostate cancer patients. *Int. J. Radiat. Oncol. Biol. Phys.*, 2014;88:1175–1179.
- [6] Sharfo A. W, Dirkx M. L, Breedveld S, Méndez Romero A, and Heijmen B. J. VMAT plus a few computer-optimized non-coplanar IMRT beams (VMAT+) tested for liver SBRT. *Radiother Oncol*, 2017;123:49–56.
- [7] Rossi L, Sharfo A. W, Aluwini S, Dirkx M, Breedveld S, and Heijmen B. First fully automated planning solution for robotic radiosurgery - comparison with automatically planned volumetric arc therapy for prostate cancer. *Acta Oncol*, 2018;57:1490–1498.
- [8] Heijmen B, Voet P, Fransen D, et al. Fully automated, multi-criterial planning for Volumetric Modulated Arc Therapy - An international multi-center validation for prostate cancer. *Radiother Oncol*, 2018;128:343–348.
- [9] Alber M and Reemtsen R. Intensity modulated radiotherapy treatment planning by use of a barrier-penalty multiplier method. *Optim. Methods Softw.*, 2007;22:391–411.
