# Supplementary material for: On the Importance of Individualized, Non-Coplanar Beam Configurations in Mediastinal Lymphoma Radiotherapy, Optimized With Automated Planning
Source: PubMed Central journal article supplement (PMC8082440; doi:10.3389/fonc.2021.619929), 2021-04-15
Supplement: Image_3.pdf [file Image_3.pdf]

# Electronic supplement C

## Inter-patient beam selection variations

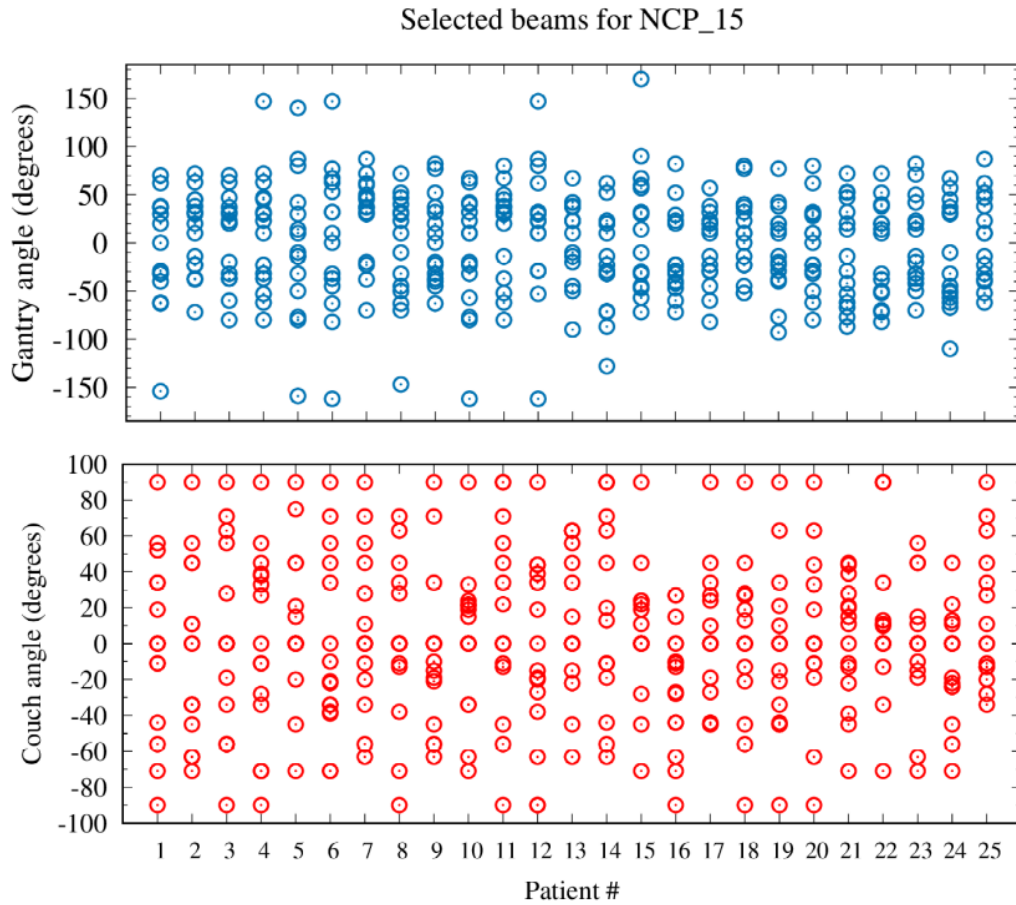

**Figure C1.** Optimized, patient-specific beam directions for NCP\_15 plans for patients 1-25.

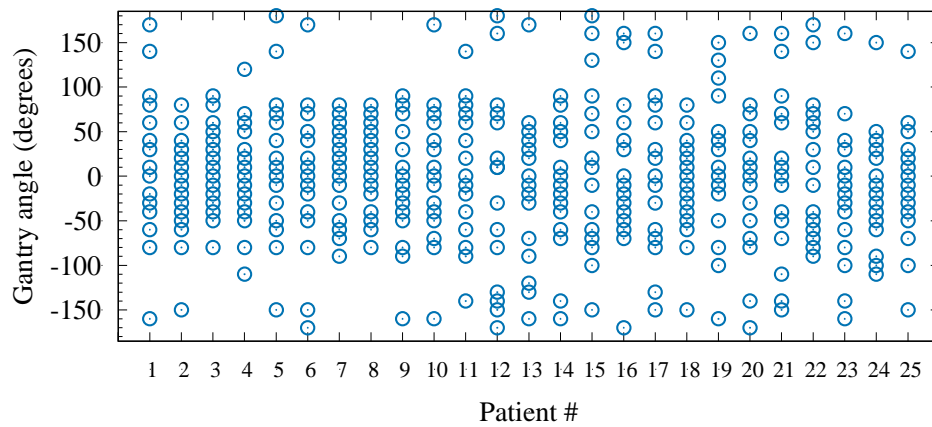

**Figure C2.** Optimized, patient-specific beam directions for CP\_15 plans for patient 1-25.
